# 1 Optimal control of gene regulatory networks for morphogen-driven tissue patterning

2 A. Pezzotta<sup>1</sup> and J. Briscoe<sup>1</sup>

3 <sup>1</sup>*Developmental Dynamics Laboratory, The Francis Crick Institute, 1 Midland Road, NW1 1AT London UK*  
4 (Dated: July 26, 2022)

The organised generation of functionally distinct cell types in developing tissues depends on establishing spatial patterns of gene expression. In many cases, this is directed by spatially graded chemical signals – known as *morphogens*. In the influential “French Flag Model”, morphogen concentration is proposed to instruct cells to acquire their specific fate. However, this mechanism has been questioned. It is unclear how it produces timely and organised cell-fate decisions, despite the presence of changing morphogen levels, molecular noise and individual variability. Moreover, feedback is present at various levels in developing tissues introducing dynamics to the process that break the link between morphogen concentration, signaling activity and position. Here we develop an alternative approach using optimal control theory to tackle the problem of morphogen-driven patterning. In this framework, intracellular signalling is derived as the control strategy that guides cells to the correct fate while minimizing a combination of signalling levels and the time taken. Applying this approach demonstrates its utility and recovers key properties of the patterning strategies that are found in experimental data. Together, the analysis offers insight into the design principles that produce timely, precise and reproducible morphogen patterning and it provides an alternative framework to the French Flag paradigm for investigating and explaining the control of tissue patterning.

## 5 INTRODUCTION

6 Embryogenesis depends on positioning functionally  
7 distinct types of cells in the right place and propor-  
8 tions, at the right time in a developing tissue. In many  
9 cases, the arrangement of differentiating cells is guided  
10 by chemical signals (usually termed *morphogens*). Em-  
11 anating from a localised source, a morphogen spreads  
12 across a field of cells to form a gradient, hence cells at  
13 different positions are exposed to different levels of the  
14 morphogen [1]. In the influential “French Flag Model”  
15 cells are proposed to read the gradient, such that the lo-  
16 cal signal concentration instructs position-dependent cell  
17 fate [2]. It has become apparent, however, that mor-  
18 phogen concentration alone is insufficient to explain the  
19 interpretation of morphogen gradients. In many tissues,  
20 morphogen gradients are dynamic and there is no simple  
21 relationship between morphogen concentration and po-  
22 sition within the tissue [3, 4]. It is also unclear how a  
23 simple gradient mechanism would allow timely and accu-  
24 rate cell-fate decisions, despite the presence of molecular  
25 noise and individual variability.

26 The interpretation of the morphogen signal involves  
27 gene regulatory networks (GRNs) in responding cells [4].  
28 These comprise the intracellular signalling pathways of  
29 the morphogens and the downstream transcriptional re-  
30 sponses and are central to transforming the continuous  
31 spatio-temporal input of morphogen signalling into dis-  
32 crete cell fates. Regulatory interactions between com-  
33 ponents of these networks appear to perform the equiv-  
34 alent of an analogue-to-digital conversion [4–7]. GRNs  
35 have also been proposed to contribute to the accuracy  
36 and reproducibility of patterning in presence of intracel-  
37 lular noise [8–10]. Moreover, non-linearities and feed-  
38 back within the GRN can confer multi-stability, mem-  
39 ory and hysteresis to cellular decision-making. A conse-

40 quence of this is that cell fate depends not only on the  
41 levels of signals and effectors, but also on their *temporal*  
42 features. Taken together, the complexity of interactions  
43 within the GRN can produce rich dynamics in the sig-  
44 nalling and gene expression in developing tissues. Un-  
45 derstanding the origin and function of these dynamics  
46 offers insight into patterning. Moreover, the interplay  
47 between morphogen gradient and GRN allow cells to ac-  
48 tively contribute to morphogen signalling, rather than  
49 being simply “instructed” by the gradient. This high-  
50 lights the need for alternative paradigms to the French  
51 Flag model, in which the GRN plays a complementary  
52 and equally important role to the morphogen, to frame  
53 questions about morphogen activity.

54 The dorso-ventral patterning of the developing ver-  
55 tebrate neural tube is a well-established example of a  
56 morphogen-patterned tissue [4, 11]. In the ventral neu-  
57 ral tube, the secreted morphogen Sonic Hedgehog (Shh),  
58 produced from the notochord and floor plate, which are  
59 located at the ventral pole, forms a ventral to dorsal  
60 gradient [12]. Binding of Shh to its receptor Patched1  
61 (Ptch1) releases the inhibition of downstream signalling  
62 and leads to the conversion of the transcriptional effectors  
63 – the Gli family of proteins – from their repressor to their  
64 activator forms. The Gli proteins regulate the expression  
65 of a set of transcription factors, which include members  
66 of the Nkx, Olig, Pax and Irx families. This comprises  
67 the neural tube GRN. Interactions between intracellular  
68 signalling and the transcriptional network, generates a  
69 dynamic response of Gli activity to varying amounts of  
70 Shh and produces a sequence of genetic toggle switches  
71 that generate distinct gene expression states over time  
72 [3, 13]. Feedback leads to the desensitisation of cells to  
73 the morphogen signal [12, 14–16], resulting in adaption  
74 in Gli activity [16]. Similar effects of negative feedback  
75 have been observed for many signalling pathways, but

76 its function and implications for morphogen-dependent 133  
77 pattern formation remains unclear.

78 Dynamical systems theory provides a framework to 134  
79 describe the activity of morphogens and GRNs. The 135  
80 behaviour produced by such models can often be rep-  
81 resented geometrically as a dynamical landscape. This 136  
82 provides an intuitive description of cell-fate decisions that  
83 corresponds to the idea of an “epigenetic landscape” pro-  
84 posed by Waddington [17]. In this view, the developmen-  
85 tal trajectory of a cell is analogous to a particle rolling  
86 on an undulating landscape, where valleys and water-  
87 sheds represent fates and decision points, respectively.  
88 Morphogens can be thought of as tilting the landscape  
89 in such a way that the valleys can be made deeper, shall-  
90 lower or disappear altogether. In this way the morphogen  
91 controls the terrain and hence the valley a cell enters. Al-  
92 though originally introduced as a pictorial representation  
93 of development, this idea has been used to develop quan-  
94 titative methods that reproduce key features of gene reg-  
95 ulatory networks and make predictions about the effect  
96 of signals [18–20]. Nevertheless, it remains a challenge to  
97 construct landscape models that incorporate knowledge  
98 of signals and GRNs. How is the landscape modified by  
99 an external signal and how feedback mechanisms be in-  
100 corporated? How can experimentally inferred landscapes  
101 give insights into the signalling dynamics?

102 Here, we set out to develop a framework to understand  
103 the intracellular signalling strategies used by cells to in-  
104 terpret a morphogen signal. Are there design principles  
105 to the signalling pathways that contribute to timely, pre-  
106 cise and accurate morphogen controlled tissue pattern-  
107 ing? What role does feedback play and does this result in  
108 a trade-off between speed, accuracy and robustness of the  
109 pattern formation? To this end, we cast the morphogen-  
110 driven patterning process as an optimal control problem,  
111 where a trade-off is sought to minimise the distance from  
112 target and the control employed. The optimization al-  
113 lows the activity of signalling effectors to be a function  
114 of both extracellular signal and target genes within the  
115 GRN. This function, can be considered a model of the  
116 signalling pathway which accounts for the feedback loops  
117 within it and from the GRN.

118 We first applied this approach to a Waddington-  
119 landscape model representing a genetic toggle switch –  
120 where analytical treatment is possible. We then extended  
121 the analysis to a dynamical-system model describing gene  
122 regulation in ventral neural tube progenitors. We show  
123 that desensitisation of the signalling pathway to mor-  
124 phogen emerges as a means to minimize control inputs  
125 in the context of multi-stability. The approach discovers  
126 morphogen patterning strategies that are widely used in  
127 biological systems and suggests an explanation for these  
128 strategies. Using this optimal control framework places  
129 morphogens and GRNs on the same footing, each playing  
130 complementary roles as parts of a whole decision-making  
131 unit. In this sense, the approach provides an alternative  
132 framework to the French Flag paradigm.

## RESULTS

### Dynamical systems and optimal control approach to cell-fate decisions

136 The dynamics of gene regulation and cell-fate decisions  
137 can be described using a Langevin equation

$$\frac{dx}{dt} = f(x, u) + \sigma(x, u) \eta . \quad (1)$$

138 where  $x$  is the set of concentrations of the components  
139 of network,  $u$  is a set of inputs or control variables. The  
140 functions  $f$  and  $\sigma$  are the drift and the strength of the  
141 noise, respectively ( $\eta$  is a standard white noise). In gen-  
142 eral, the noise term has a multiplicative form, which ac-  
143 counts for stochasticity that arises not only from exter-  
144 nal disturbances but also from the finite number copy  
145 number of each species in the network [21]. The drift  
146 and noise functions  $f$  and  $\sigma$  can incorporate mechanistic  
147 knowledge of the regulatory logic of the network and the  
148 effect of morphogen signalling, for instance, transcrip-  
149 tional control via binding/unbinding of transcription fac-  
150 tors to their respective regulatory elements and cooper-  
151 ative and competitive effects [13, 22, 23].

152 The dynamical systems that result from representing  
153 GRNs in this way are generally non-linear and may op-  
154 erate in multi-stable regimes. The input  $u$  can substan-  
155 tially change the dynamics of the network, altering the  
156 position of attractors (stable states) and saddle nodes  
157 (decision points). Moreover, the attractor reached by a  
158 system depends on the full past history of the inputs.  
159 This can be seen, for example, in the neural progenitor  
160 GRN [13], where the input  $u$  comprises the activating and  
161 repressing forms of the morphogen regulated Gli effectors  
162 (Fig. 1 (a) and (b)). The behaviour of such systems can  
163 be visualised as a dynamical landscape with valleys rep-  
164 resenting the stable states of the network and signals tilting  
165 the landscape to determine which valleys are accessible  
166 or inaccessible. The dynamical system function  $f$  is thus  
167 given by the gradient of the landscape,  $V$ , parametrically  
168 dependent on the effector  $u$ . This approach has been used  
169 to reproduce the qualitative features of GRNs as well as  
170 to predict patterning processes in embryos [18, 19] and  
171 proportions of cell types in differentiation protocols [20].

172 Given this dynamical systems view of patterning, how  
173 does the signalling input to a GRN generate a sufficiently  
174 precise pattern in a developmentally relevant time pe-  
175 riod? To address this we recast patterning as an opti-  
176 misation problem and ask what sort of signal input is  
177 necessary to produce precise, reliable and timely cell-fate  
178 decisions. The framework that naturally deals with these  
179 types of problems is optimal control theory. We are faced  
180 with the task of choosing a dynamic signalling regime  $u$   
181 (here referred to as *control*) that minimizes the average  
182 of a cost accumulated along the trajectory plus a cost  
183 determined by the distance from the target at the termi-  
184 nation of the decision task – in the cell-fate decision case,  
185 a differentiation event. This can be expressed in terms  
186

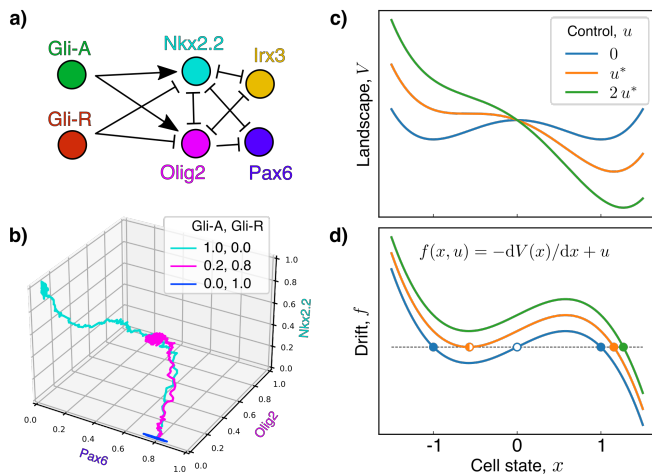

FIG. 1. External input changes the stability properties of the dynamical system. (a) We consider a model of gene regulation which describes the patterning dynamics in the ventral neural tube with the addition of intrinsic noise [8, 13]. (b) Different levels of the inputs Gli-A and Gli-R (see legend) result in qualitatively different trajectories in gene expression space. Starting from the same state (low Nkx2.2 and Olig2, but high Pax6 and Irx3 – the latter suppressed in the 3D plot), the trajectories end in different stable fixed points. (c) In the Waddington-landscape picture, cell-fate decisions can be thought of as a drive towards different possible minima of a potential landscape, the “depth” of which are controlled by external signals ( $u$ ) that “tilt” the landscape. (d) In this analogy, cell-fates are the stable fixed points of the corresponding dynamical system – the minima of the landscape (full circles). Varying external inputs changes the dynamical properties of the system, by creating and destroying attractors and fixed points; for instance, a saddle-node bifurcation corresponds to the coalescence of a stable fixed point with an unstable fixed point (empty circle).

of a cost rate  $\tilde{\ell}$  (or *running cost*) that gives a measure of the instantaneous performance, along with a terminal cost  $Q$ . We construct the function  $\tilde{\ell}$  to measure how far gene expression deviates from its target (via a function  $q$ , which is minimum at the target) and how much control is exerted in the process, e.g. by adding a term quadratic in  $u$  weighted by a parameter  $\epsilon$ ; the terminal cost  $Q$  is also chosen to measure the distance from the target, and is here assumed to be identical to  $q$  up to a unit time constant. In summary, we express the cost

$$C = Q(x(T)) + \int_0^T dt \tilde{\ell}(x(t), u(t)), \quad (2)$$

and seek a function  $u$  minimising its mean over realisations of the dynamics in Eq. (1). Here,  $T$  is the random time of differentiation, which is assumed to be exponentially distributed, with mean  $\tau$  – or, equivalently, to occur at any time with uniform probability rate  $\tau^{-1}$ .

From the point of view of decision making, and therefore planning, the constant rate of differentiation assigns more weight to more imminent events, while discounting

those further away in the future (see SI, Sec. SI-1 b). As shown in SI, Sec. SI-1 c, the minimisation of the cost in Eq. (2) is equivalent to that of

$$C = \int_0^\infty dt e^{-t/\tau} \ell(x(t), u(t)), \quad (3)$$

where  $\ell = \tilde{\ell} + \tau^{-1}Q$ . This form of the cost explicitly expresses the notion of future discounting. For these cost functions, the conditions for optimality acquire the form of differential equations, and yield the optimal  $u$  in the form of feedback control,  $u^*(t) = \phi^*(x(t))$  (see Sec. in Methods and SI). This framework is particularly relevant in the context of the control of gene expression in a cell, where aspects of the signal transduction pathway and the signal effector can be under the control of the transcription factors in the GRN (Fig. 2 (b)). When the optimality equations cannot be solved analytically or numerically, approximate solutions can be found via techniques such as reinforcement learning (RL) [24]. Solving for the optimal control  $u^*$ , yields optimal feedback designs and can shed light on the functional role of observed feedback mechanisms.

### Controlling the epigenetic landscape of a genetic switch

In order to illustrate this method, and to understand the parameters of the cost function, we first considered a simple model for a binary cell-fate decision. A one-dimensional double-well potential  $V(x)$  with minima at  $\pm 1$ , which correspond to two possible cell fates (see SI, Sec. SI-1). In this example, the noise is modelled as additive and independent of control, i.e.  $\sigma = \sqrt{2D}$ , with constant  $D$ . We model morphogen signaling as a drift contribution  $u$ , which “tilts” the landscape,  $V(x, u) = V(x) - u \cdot x$  (Fig. 2 (c)). We then seek to find the control protocol  $u$  (the dynamics of signal) that drives a cell from state  $x = -1$  to the state  $x = 1$  in the optimal way, i.e. minimizing the combination of how far the cell is from its target and the amount of control exerted to accomplish this (see SI, Eq. (S2) and (S16)).

In this model, an exact solution of the optimality equations can be found with numerical methods. The resulting optimal control protocol leads to adaptive dynamics: high levels of control are necessary to leave the initial attractor, then as the system approaches the target attractor, the amount of control is minimal, and only required to prevent noise from reversing the transition (Fig. 2 (f), and Fig. S1). From this example we see that the optimal solution minimises control by taking advantage of the multi-stability built in the system.

The linearity of the dynamical system with respect to  $u$  and the quadratic cost for control, means that the optimally controlled drift can be expressed as the negative gradient of a landscape function  $V_{\text{eff}}$ . This represents a combination of the original landscape  $V$  and the optimal

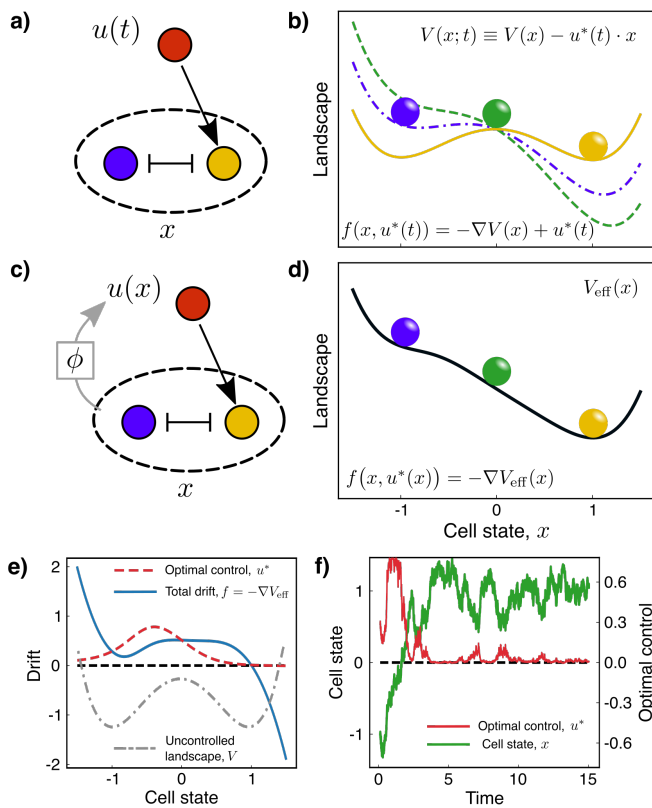

FIG. 2. Optimal control representation of a Waddington landscape. (a) A GRN for a simple toggle-switch network with two genes can be dynamically controlled to reach a target state by explicitly defining a signalling protocol  $u(t)$  (open-loop control). (b) In the Waddington-landscape picture, we can think of the external control as “tilting” the landscape over time; the coloured lines represent the instantaneous landscape felt by the “particle” of the same colour. (c) Alternatively, the signal can be placed under control of the target genes through a feedback function  $\phi$ . This results in closed-loop, or feedback, control. (d) The optimal closed-loop control is incorporated into a “static” effective landscape, describing the dynamical properties of the signalling and GRN system as a whole. (e) The solution for the optimal control (dashed red line) exhibits adaptation near the target, when this corresponds to a stable fixed point of the uncontrolled landscape (dashed-dotted grey line, not in scale). (f) This can also be seen in a sample trajectory of the dynamics of a cell (green line), where the control (red line) is switched off after an initial transient, and is activated only to prevent large fluctuations away from the target. For (e) and (f), the parameters used are  $D = 0.10$ ,  $\tau = 10$  and  $\epsilon = 10$ .

257 cost expected to be paid from a given state  $x$  (the cost-  
 258 to-go function, see Methods). Thus, rather than thinking  
 259 of the control as tilting the landscape, it can  
 260 be incorporated into a new landscape that describes the  
 261 system as a whole (Fig. 2 (d)). This observation suggests  
 262 that the inverse problem might provide insight into the  
 263 function of feedback mechanisms in cell-fate decisions:  
 264 given experimental observations and a landscape asso-  
 265 ciated with the underlying GRN, it might be possible

266 to distinguish the contributions of the controlled system  
 267 (the GRN) from the feedback mechanisms (Fig. 2 (e)).

268 This example also provides intuition into the effect of  
 269 the differentiation rate – equivalently, of discounting cost  
 270 over time. What is the optimal behaviour of the system  
 271 before a cell differentiates?

272 At one limit, when the differentiation rate is high,  $\tau \simeq$   
 273 1 (in units of the overall time-scale of the system), and  
 274 noise,  $D$ , is low, only imminent running costs and the  
 275 terminal cost are taken into account in planning, and  
 276 the optimally controlled dynamical system is bistable.  
 277 This is because when the system is far from its target, a  
 278 substantial reduction in the distance of the system from  
 279 its target within a short time  $\tau$  would have a very high  
 280 cost for control. Therefore, the only part of the cost  
 281 that the controller *can* minimize is the cost of control  
 282 itself. This leads to low values of the control at every  
 283 state, and the system remains within the bi-stable regime  
 284 (Fig. 3 (a,c) and S1, bottom left). Such small values of  
 285  $\tau$ , would mean that a cell only rarely reaches its target  
 286 before differentiation.

287 Strikingly, very similar dynamics are observed in the  
 288 opposite limit, when  $\tau = \infty$  (Fig. 3 (a,c) and S1, top left).  
 289 Here, no terminal cost is paid, and the problem consists  
 290 of optimising the average cost per unit time at steady  
 291 state. For low  $D$ , when multiple stable fixed points are  
 292 present (as in the case of small  $u$  – bistable regime), the  
 293 system spends long periods of time near each of them,  
 294 with rare stochastic transitions between. In SI, Sec. SI-  
 295 1d, we demonstrate how the steady-state average of the  
 296 cost  $q$  is exponentially small in  $u/D$ , when  $D$  is small:  
 297 this allows very low values of  $u$  to yield large discrepan-  
 298 cies between the probabilities of being in either attractor  
 299 at steady state. This explains why, in such limit, it is  
 300 optimal to choose  $u$  well within the bistability regime.

301 For intermediate values of  $\tau$ , the optimally controlled  
 302 dynamics are such that the time needed to perform the  
 303 switch is comparable with  $\tau$  itself. When this is the case,  
 304 characteristic transient dynamics are observed: in a first  
 305 phase, high levels of control are applied to the system in  
 306 order to drive the transition; in a second phase, the con-  
 307 trol can be reduced to very low levels, within the bistable  
 308 regime. This suggests that, in these scenarios, the opti-  
 309 mal strategy is for the controller to apply high levels of  
 310 control for a short time resulting in a lower cost from  
 311 being off target for a shorter period of time (Fig. 3 (a,d)).  
 312 This effect is less and less pronounced with increasing  
 313 noise levels,  $D$ : the distribution of transition rates are  
 314 controlled more and more by noise, with a smaller and  
 315 smaller average transition time (Fig. 3 (a)).

316 By making use of a simple Waddington landscape  
 317 model, this example shows how optimal control theory  
 318 can make sense of adaptation as the most “parsimonious”  
 319 strategy to drive a cell to a desired target, while exploit-  
 320 ing the multi-stability of a downstream network and its  
 321 stochastic dynamics. The analytical results suggest an  
 322 explanation for optimal signalling in the face of varying  
 323 degrees of noise and multi-stability, and for different val-

ues of differentiation rates, which set the exponentially distributed time horizon within which cell-fate decision needs to take place.

### Control of cell-fate in ventral neural progenitors

Next, we applied this optimal control approach to a GRN model that captures the patterning dynamics in the ventral region of the developing neural tube [13]. In this model noise from fluctuations in the copy number of components of the system have been introduced using the chemical Langevin equation approximation [8, 22] (Fig. 1, and reported in SI, Sec. SI-2 a). The control here is a two component vector representing the activator and repressor form of the morphogen controlled Gli effectors. These directly regulate the two most ventral markers, Nkx2.2 and Olig2 (Fig. 2 (a,b)). In this case, we find an approximate solution of the optimal control equations via reinforcement learning (RL) [24]. RL provides the means to identify optimal control strategies, without knowledge of the dynamical system function  $f$ , by sampling states, actions (controls) and running costs (or reward signals). Here, and in the following section, we use the TD3 algorithm [25] which is a state-of-the-art RL algorithms for continuous control problems (see SI, Alg.1 for details). Using this approach we identify optimal control strategies for the system to adopt an Olig2 state or a Nkx2.2 state.

In all cases, we optimize the discounted cost function, Eq. (S16), with  $\tau \simeq 5$  (A.U.): this can be compared to the half-life of Nkx2.2 and Olig2,  $t_{1/2} \simeq 0.35$  (in simulation units – see Tab. I in SI). Thus, if  $t_{1/2} \simeq 4h$  then  $\tau \simeq 2.5$  days, consistent with the developmental time scales in the embryonic mouse neural tube. For both targets, the control input shows a very clear transient. Convergence of the RL algorithm to an optimal strategy in the transient is hard to achieve due to the poorer sampling of the transient configurations, resulting in run-to-run variance; however, the control strategy at steady state is consistent throughout experiments (see Fig. S3).

Acquiring and maintaining the Olig2 state requires a very high sensitivity of control with respect to Olig2 levels, which is reflected in the high variability of the repressive form of Gli effector at a population level (Fig. 4 (a)). The learnt control is such that below a threshold value of Olig2, Gli repressor is high, and above the threshold Gli repressor is low (Fig. 4 (b)). One explanation for this could be that higher levels of repressor are necessary to restrain the system from bifurcating to Nkx2.2 when levels of Olig2 are too low. This is consistent with the experimental evidence that Olig2 may provide negative feedback onto the expression of Gli3, which is the dominant repressor for Shh signaling [16, 26, 27].

This can be compared to the result for the Nkx2.2 target. Similar values for the activator form of Gli are found at steady state, but much lower values for Gli repressor are observed. The overall low levels of the effec-

tors is also consistent with the repressive role of Nkx2.2 on Gli gene expression, as supported by experimental data [15, 16, 27]. It is notable that under the optimally controlled dynamics, a cell reaching the Nkx2.2 target must transition through the Olig2 state before acquiring Nkx2.2 expression.

### Morphogen-driven patterning

In the previous section we identified optimal control strategies independently for two target states. Here we extend the approach to identify an integrated optimal control strategies that would generate a morphogen patterned tissue comprising multiple states in response to a spatially graded morphogen signal. We then define the state of the controlled system to comprise the GRN state and the signal as subsystems.

Patterning, as an optimal control problem, can be conceived as a cooperative multi-agent task, whereby multiple cells have to reach their respective targets simultaneously, but where the shared morphogen input provides the positional information. Collectively, cells minimize a global shared cost, with the constraint that controller function – representing the signalling pathway with its feedback loops – has to be the same for all cells. The target pattern, implemented through the running cost  $g$ , has two boundaries that divide the tissue into three equal parts, with ventral, middle and dorsal fates corresponding to Nkx2.2, Olig2 and Pax6+/Irx3 expressing, respectively. We adapt the TD3 algorithm for the patterning task, and test it on the patterning of the ventral neural tube (see SI, Alg. 2).

The morphogen dynamics are given by stochastic simulations of a diffusion process of independent Shh particles, while the GRN model is the same as in the previous section (details in SI, Sec. SI-2). We derive the optimality equation for this, in the ansatz of independent cells (in SI, Sec. SI-3. This ansatz can only be an approximation to the optimal solution, because the (stochastic) morphogen dynamics exhibit spatio-temporal correlations. Indeed, it works for a deterministic and static gradient – where the ansatz is exact (Fig. S4) – and can be a good approximation when the steady-state of the morphogen is reached fast compared to the GRN. A naive implementation of the independence ansatz for a “slow” morphogen fails to reproduce the target pattern, due to the increasing effect of the correlations between morphogen signals at different locations in the tissue. Nevertheless, the (ensemble) average of the morphogen signal experienced by individual cells can be expressed with independent but non-autonomous dynamics (see SI, Sec. SI-2 b).

This suggested that the introduction of memory variables into the decision making may help to solve the problem, by “extracting” temporal features of the morphogen (Fig. 5 (a), and SI, Sec. SI-3 c). These variables can be thought to represent the intermediate components in the signalling cascade, such as the Shh receptor Ptch1

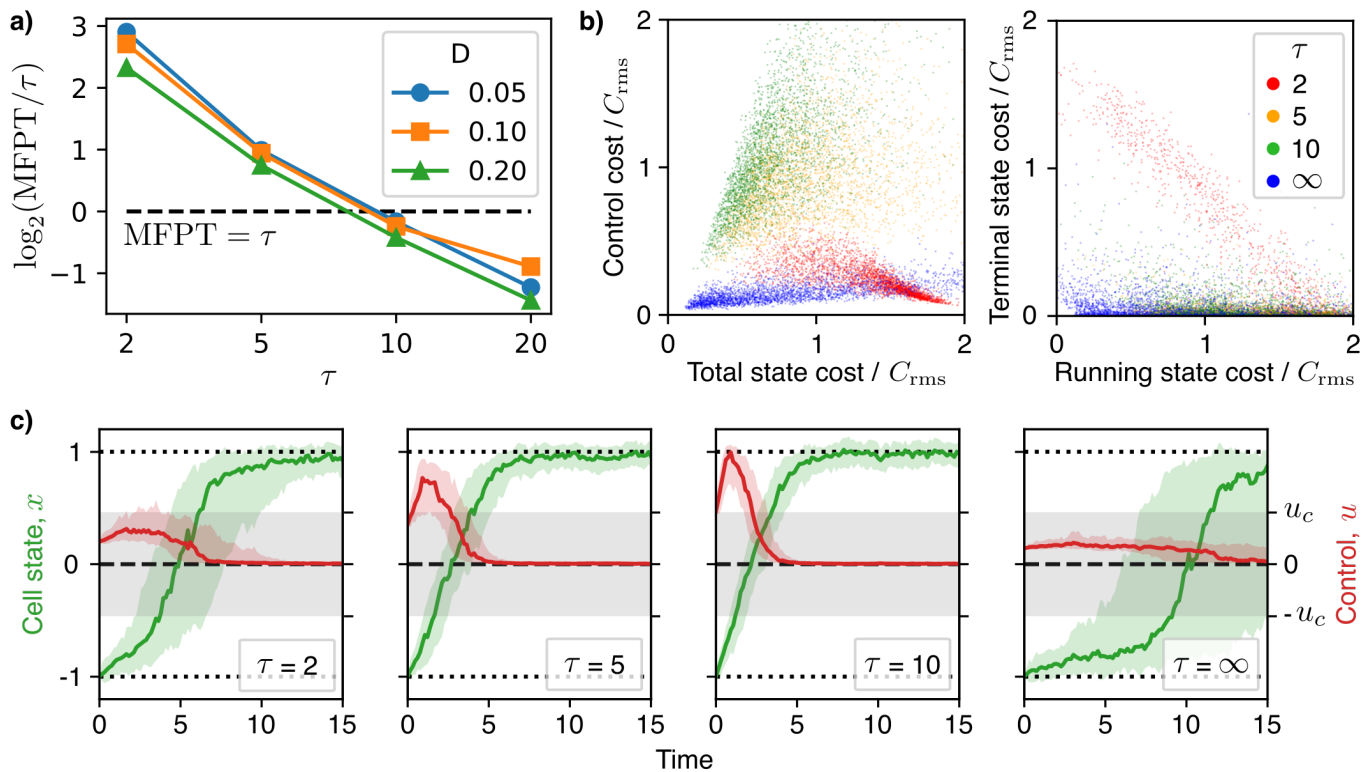

FIG. 3. Effect of the discounting (differentiation) time  $\tau$ . (a) The mean first passage time (MFPT) at the target  $x = 1$  from  $x_0 = -1$  as a function of  $\tau$ , from the numerical integral of the analytical formula, under the optimal control. This is shown relative to the value of  $\tau$  on a logarithmic scale. For high (low) values of  $\tau$ , the MFPT for the optimally controlled dynamics is far lower (higher) than  $\tau$  itself, and decreases with the strength of the noise,  $D$ . (b) State and control costs from 5000 simulations for various values of  $\tau$  (colour-coded). The optimal control for “small” or “large” values of  $\tau$ , effectively minimises cost for control, while for intermediate values of  $\tau$  a non-trivial trade-off is observed (left panel). Only for low values of  $\tau \simeq 1$  does the terminal cost for the distance from the target have a large contribution to the overall cost (right panel). (c) Statistics of 100 samples of the dynamics for the state (green) and the control (red). Solid lines are the median values, shaded areas the 25-75 percentile. The grey shaded area highlights the values of the control variable  $u$  for which the controlled landscape is still bistable, i.e. between the bifurcation values  $\pm u_c$ . In all panels,  $\epsilon = 10$ ; in b) and c)  $D = 0.05$ . For intermediate values, when the MFPT is comparable to  $\tau$ , the switch is driven by a non-trivial transient dynamics for the control, resulting from competition between control and target running costs.

434 and the transmembrane protein Smo etc. The activity  
 435 of these components in response to Shh introduce delays  
 436 and persistence to the transmission of the instantaneous  
 437 changes in the morphogen. The control model we intro-  
 438 duce features more general feedback mechanisms within  
 439 the signalling cascade and from the GRN species. With  
 440 this extension, the algorithm is able find strategies that  
 441 lead to the target pattern (Fig. 5 (b)), which we were not  
 442 able to achieve without the memory variables.

443 In Fig. 5 (b), we see the average of several simulations  
 444 of the tissue patterning process: at the beginning of the  
 445 morphogen spread, all cells are in the initial pre-pattern  
 446 (dorsal) condition. As morphogen spreads into the tissue,  
 447 Olig2 and Nkx2.2 are sequentially induced ventrally, re-  
 448 sulting in a kinematic wave of gene expression spreading  
 449 from ventral to dorsal until the target pattern is reached.  
 450 The pattern is then maintained. The dynamics of the ef-  
 451 fectors in individual cells (Fig. 5 (c)) share some features  
 452 with those found for the single cell control (Fig. 4 (a,c)).

453 Because the initial conditions are the same for all cells  
 454 in the tissue (Pax6+/Irx3+, vanishing morphogen signal  
 455 and memory variables – see SI, Sec. SI-3 c), the signal lev-  
 456 els are also the same, corresponding to the values needed  
 457 to maintain cells in the dorsal state, i.e. high levels of  
 458 repressor together with low levels of activator (Fig. 5 (c),  
 459 top). For cells that are assigned to an Olig2+ fate, after  
 460 an initial delay set by the spread of the Shh morphogen,  
 461 the dynamics are remarkably similar to those found for  
 462 the Olig2 target in a single cell: levels of repressor nega-  
 463 tively correlated with Olig2 concentration and low lev-  
 464 els of activator at steady state (Fig. 5 (c), middle). In  
 465 cells acquiring an Nkx2.2+ fate we also observe a nega-  
 466 tive correlation of Gli repressor levels with Nkx2.2 (Fig. 5  
 467 (c), bottom). Thus, the learnt control strategy recovers  
 468 the repressive feedback from both Olig2 and Nkx2.2 on  
 469 Gli, which results in adaptive dynamics of the signalling  
 470 effectors. Both of these features are supported by exper-  
 471 imental data [15, 16, 26, 27].

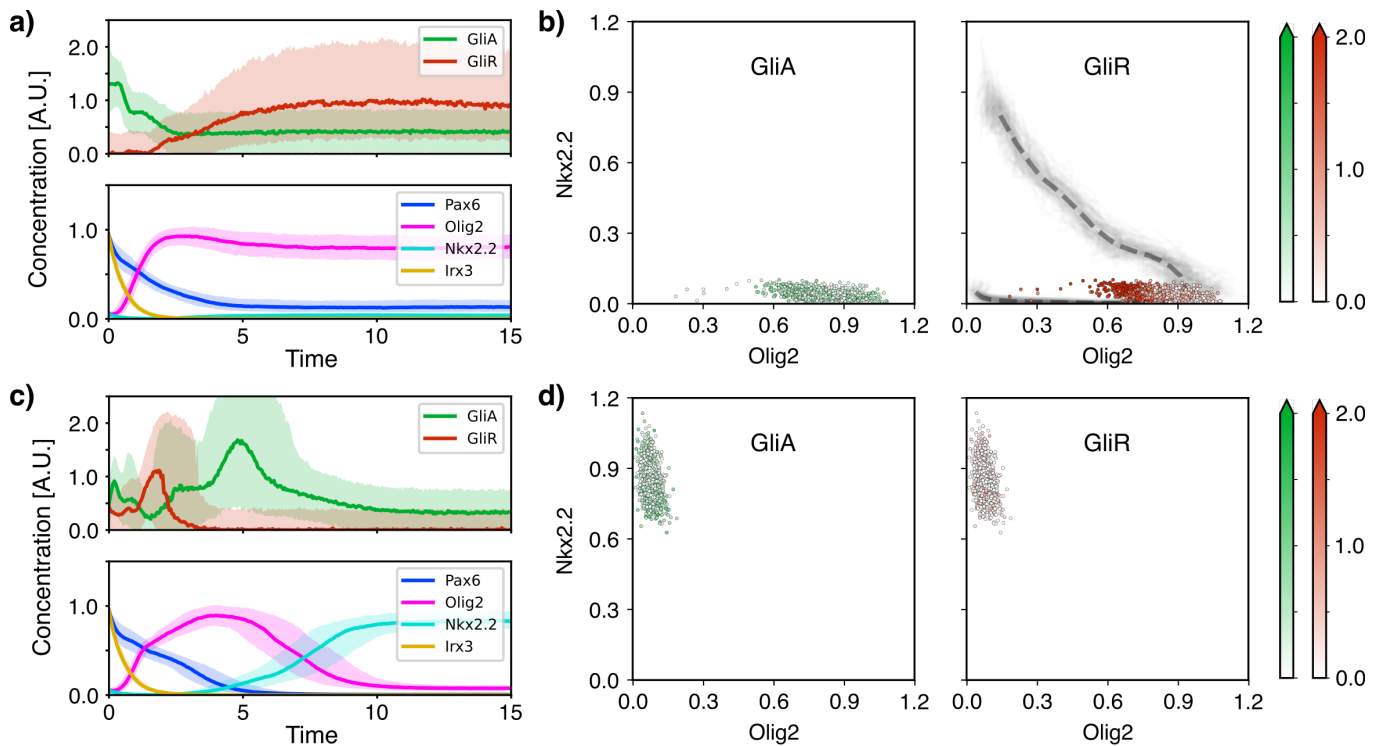

FIG. 4. Reinforcement learning solution for the optimal control of the ventral neural tube GRN. (a) Samples of the controlled dynamics for the Olig2 target. The control  $u^*$ , comprising activator and repressor Gli (top panel) and the resulting gene expression dynamics (bottom panel). (b) Snapshot at steady state of the optimal control  $u^*$  for activator Gli (left panel) and repressor Gli (right panel) as a function of Olig2 and Nkx2.2 levels. In (c) and (d), the analogous plots, for the Nkx2.2 target. In both cases, Gli activity (relative value of activator vs repressor) is high in a first transient, and decreases over time. A negative feedback from Olig2 onto the repressor appears to be required to maintain cells in the Olig2+ state – see (b), right panel. One possibility is that this prevents the activator driving the state towards Nkx2.2+ state (the optimally controlled trajectories of panel (c) are overlaid as grey lines – the dashed grey line is the average).

472

## DISCUSSION

473 Here we used optimal control theory to develop a  
 474 framework to analyse morphogen signaling strategies and  
 475 identify mechanisms that produce rapid, precise and re-  
 476 producible cell-fate decisions during tissue patterning in  
 477 embryo development. We demonstrate that this frame-  
 478 work can be combined with dynamical – Waddington –  
 479 landscape models of cell-fate decisions to provide an op-  
 480 timal control representation in the form of a new land-  
 481 scape. Reinforcement Learning can be used to solve opti-  
 482 mal control problems associated with signalling and cell-  
 483 fate decisions and we formulate the patterning problem as  
 484 a multi-agent cooperative optimal control task, in which  
 485 the objective function is a measure of performance of  
 486 all the cells in the tissue. By using these approaches to  
 487 analyse the morphogen patterning of neural progenitors  
 488 we highlight how the optimal mechanisms obtained are  
 489 consistent with experimental data.

490 The analysis revealed that for both individual cell fate  
 491 decisions and for morphogen-driven tissue patterning,  
 492 adaptive signalling dynamics, which are observed exper-  
 493 imentally *in vivo* [28], emerge as an optimal strategy in  
 494 the presence of multi-stability. This suggests that sig-

495 nalling pathways have evolved to take advantage of the  
 496 dynamical landscape that arises from the gene regula-  
 497 tory network. By contrast, in the celebrated French Flag  
 498 model of morphogen patterning, cell fates are proposed  
 499 to be instructed by morphogen concentration with the con-  
 500 centration viewed as being read out directly by cells [2].  
 501 While the French Flag model has been crucial for high-  
 502 lighting the role of morphogens in pattern formation, it  
 503 does not explain the complex cellular signalling dynam-  
 504 ics that are often observed experimentally. Moreover, it  
 505 subordinates the role of the GRN to that of the extracel-  
 506 lular signals. The optimal control perspective provides  
 507 an alternative paradigm that accommodates the dynam-  
 508 ics in signal interpretation and establishes a relationship  
 509 between the control signal and the system. This pro-  
 510 vides a framework that complements dynamical systems  
 511 approaches to gene regulation – where signals are exter-  
 512 nally imposed – by making signalling an integrated part  
 513 of a whole decision-making unit: the cell.

514 The objective function includes a notion of “timing”  
 515 through exponential discounting. This can be regarded  
 516 as representing the tempo of development and the rate  
 517 of differentiation in a tissue, which limits the amount of  
 518 time that is available to the cell to integrate the signal

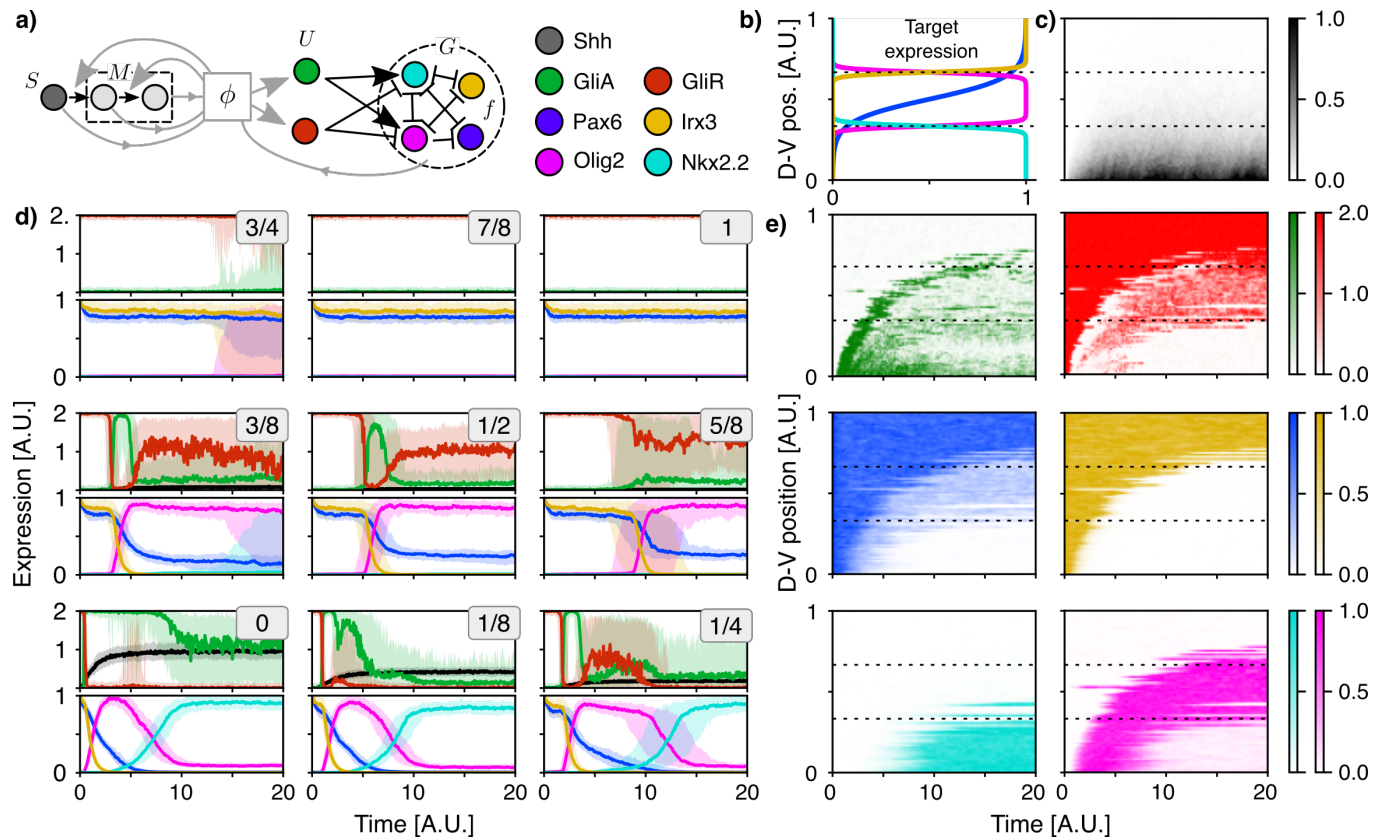

FIG. 5. Reinforcement learning solution for the morphogen-driven patterning task. The optimal control model (a) gives the signalling effectors  $U$  (Gli-A/R) as a function  $\phi$  of the target genes  $G$ , the morphogen signal  $S$  and memory variables  $M$ . The goal is to minimise a trade-off between the distance from a target gene expression profile (b) and the magnitude of the control over time. The dashed lines at  $1/3$  and  $2/3$  of the total D-V extension indicate the positions of the boundaries between target differential expression regions. The patterning process is driven by a stochastic diffusion of the Shh morphogen  $S$  (c). In (d), the cell-by-cell view of the dynamics averaged over 100 simulations (solid lines are the medians, and the shaded areas the 10-90 percentile, and individual panels are labelled by the D-V position of the selected cells) reveals the control strategy for each position. Similar features shown in Fig. 4 are also found here, highlighting the potential functional role of Gli repression by Olig2 and Nkx2.2 in the patterning process. In (e) a single realisation of the optimally controlled dynamics with the morphogen field as in (c).

519 and make a decision. We set this time to be comparable  
520 with differentiation rates and the degradation rates of the  
521 key transcription factors in the GRN [29].

522 Importantly, when a Waddington landscape offers a  
523 good phenomenological model of cell-fate decision, the  
524 optimal control framework provides analytical tools to  
525 “isolate” the contribution of morphogen signalling to the  
526 GRN dynamics. Practically, this could be achieved via  
527 the comparison of experimentally measured landscapes  
528 under different genetic or pharmacologic manipulations  
529 of signalling pathways [20].

530 There are limitations to our approach that will need to  
531 be addressed in future work. In the current formulation,  
532 the control input to the system is selected in a “reactive”  
533 way, as a function of the target genes. This rules out pos-  
534 sible hysteresis effects in feedback mechanisms. This is  
535 partially addressed via the addition of memory variables  
536 in the morphogen-driven tissue patterning example. Yet,  
537 the signalling effectors – as a function of components of

538 the GRN – still retain a memory-less component. This  
539 could be tackled by introducing production-degradation  
540 dynamics, where the control defines the production rates,  
541 rather than the levels. This would have the benefit of al-  
542 lowing the inclusion of known kinetic properties of the  
543 effectors, such as degradation rates [29]. Also, the degra-  
544 dation rate has been assumed independent of the cell  
545 state. The control problem solved here can be extended  
546 to cases where the terminal-time statistics depends on the  
547 state and control variables, and include optimal stopping  
548 time problems (see e.g. [30]).

549 From the RL perspective, the introduction of mem-  
550 ory variables is analogous to the use of recurrent net-  
551 works for modelling systems with memory [31], e.g. in  
552 partially observable environments [32, 33]. Examining  
553 this problem in the broader context of decision making  
554 in non-Markovian or non-stationary environments [34]  
555 could highlight general design principles that optimally  
556 deal with memory. It is interesting to note that the



morphogen-driven patterning task can be formally regarded as a classification of signal time series: hidden in the optimally-controlled dynamics are the features of the temporal profile of the signal which can be utilised by the cell in order to make decisions. Hence the optimal control perspective provides a link between the complex computational problem of morphogen interpretation and the biological hardware available for its solution.

We did not address all possible feedback mechanisms that could be exploited by the system. For example, Shh signaling controls the expression of Shh binding proteins, such as Ptch1, Scube2 and Hhip1, that alter transport of the morphogen through the tissue [12, 14, 35]. Feedback on morphogen spread could be incorporated into the model. Indeed, the framework could be used to investigate virtually any aspect of the system. This could include, for example, control of diffusivity of signals, degradation rates of system components, or the accessibility of cis-regulatory elements and the effect of chromatin remodelling. All of which have been implicated in the interpretation of morphogen signalling [1, 8, 14].

The patterning example dealt with in this study is one in which positional information is provided by a signal external to the tissue. In other cases, symmetry is broken and patterning controlled by internally generated signals, such as in the case of organoids patterned by Turing-like mechanisms [36]. Patterning, in these contexts, poses a problem of coordination by means of signalling that can be cast into a multi-agent decision making task. This, in turn, can be tackled numerically with multi-agent RL (MARL) algorithms [37, 38] or analytically via, e.g. mean-field approximation in the limit of large numbers of cells [39, 40]. Therefore, optimal control provides a framework in which to analyse these systems to investigate functional explanations for the observed signalling strategies, proportions of cell types and self-organisation of patterning.

The optimal control approach, with its focus on linking mechanisms with control, is ideally suited for the analysis of *in vitro* and synthetic systems. This could be used to design and refine signalling regimes for the directed differentiation of stem cells *in vitro* and the production of specific sets of cell types in defined proportions. An understanding of the control principles operating in biological systems will provide insight and inspiration for the construction of artificial systems and will support the use of stem cells in disease modelling and regenerative medicine.

## ACKNOWLEDGEMENTS

We are grateful to Rubèn Perez-Carrasco and Zena Hadjivasilou and members of the lab for their constructive comments. A.P. thanks Antonio Celani for insightful discussions. A.P. was funded by the EMBO Long Term Fellowship ALTF 860-2019. This work was supported by the Francis Crick Institute, which receives its core fund-

ing from Cancer Research UK, the UK Medical Research Council and Wellcome Trust (all under FC001051). Work in the Briscoe lab is funded by the European Research Council under European Union (EU) Horizon 2020 research and innovation program grant 742138.

## METHODS

### Optimal stochastic control and its solution

Given a system with state variables  $x$  satisfying the controlled stochastic dynamics

$$\frac{dx}{dt} = f(x, u) + \sigma(x, u) \eta(t), \quad (4)$$

where  $f$  is a deterministic drift,  $\sigma$  – multiplying the standard Gaussian white noise  $\eta$  – is the magnitude of the noise and  $u$  represent a set of control variables, we ask what is the optimal choice of the control variables  $u$  over time in that minimizes the mean of a cost function

$$C = \int_0^\infty dt e^{-t/\tau} \ell(x(t), u(t)), \quad (5)$$

where  $\ell$  is a cost per unit time (also termed running cost) associated with the instantaneous state and control at a given time, and  $\tau$  sets the time-scale for the exponential discount factor – defining the “far-sightedness” of the decision-maker in the estimation of the cost that is expected to be paid in the future. As we show in SI, Sec. SI-1 c, optimal-control problems with terminal-state cost and uncertain terminal time can be cast in the minimisation of a cost function of the form Eq. (5). Throughout this study, the running cost has the form  $\ell(x, u) = q(x) + \epsilon \|u\|^2/2$ , that is a trade-off between the squared magnitude of the control and a state-dependent cost measuring the squared distance from a target  $\xi$ ,  $q(x) = \|x - \xi\|^2/2$ .

For the class of cost functions in the form of Eq. (5), it is possible to solve the optimal control problem via dynamic programming. This is achieved by maximising, at every state  $x$ , the value function  $J_u$ , defined as the negative of the cost-to-go function

$$J_u(x) = -\mathbb{E}_{u(\cdot)} [C \mid x(0) = x] \quad (6)$$

i.e. the cost to be paid conditioned on the initial state, averaged over all the realisations dynamics in Eq. (4), with control function  $u$ .

$$f \cdot \nabla J_u + D \nabla^2 J_u - \ell = 0 \quad (7)$$

where  $D = \sigma^2/2$  and  $\nabla$  is the gradient with respect to the state variables  $x$ .

The value function corresponding to the optimal control  $u^*$ , denoted  $J^* \equiv J_{u^*}$ , therefore satisfies

$$\max_u \{ f \cdot \nabla J^* + D \nabla^2 J^* - \ell \} = 0. \quad (8)$$

This equation, known as the *dynamic programming* (or *Bellman*) equation [41, 42], yields the optimal cost as well as the optimal control as a function  $u^*$  of the state  $x$ . The non-linearity introduced by the max operator, along with the infinite number of states (for continuous states and actions), makes the exact solution of Eq. (8) generally impossible.

Numerical techniques can be employed to find approximate solutions: reinforcement learning (RL) [24] with

function approximation through deep neural networks [25, 43] is the numerical scheme used in this work for the solution of Eq. (8) for the optimal control of the ventral neural tube GRN. However, the case where  $\sigma$  is constant while  $f$  and  $\ell$  have, respectively, linear and quadratic dependence on  $u$  (as in the case of the control in a landscape dealt with in the main text), falls into a general class of linearly solvable control problems [44, 45], in that Eq. (8) can be cast into a linear form through a change of variables (as detailed in SI, Sec. SI-1).

## SUPPLEMENTARY INFORMATION

### SI-1. Optimal control in a potential

Let us consider the Langevin dynamics

$$\frac{dx}{dt} = -\nabla V + u + \sqrt{2D} \eta \quad (\text{S1})$$

where  $V$  is a confining potential,  $\eta$  is a Gaussian noise with  $\langle \eta(t) \eta(t') \rangle = \delta(t - t')$  and  $u$  is an additional control drift. The control  $u$  is chosen to minimize a given cost functional, as detailed in the following. We choose the potential  $V$  in such a way that the uncontrolled dynamics has two stable fixed points (i.e. minima of  $V$ ) at  $x = \pm 1$ :  $V(x) = x^4/4 - x^2/2$ .

#### a. Stationary-state optimization

We introduce the cost function

$$C_u = \lim_{T \rightarrow \infty} \frac{1}{T} \int_0^T dt \left( \frac{\epsilon}{2} |u(t)|^2 + q(x(t)) \right) \quad (\text{S2})$$

with

$$q(x, u) = \frac{1}{2} |x - \xi|^2 \quad (\text{S3})$$

We seek to find the control strategy  $u$  that minimizes the expectation value of  $C_u$  over all realisations of the stochastic dynamics Eq. (S1). If the system is ergodic,  $\mathbb{E}[C_u | X_0 = x]$  is a constant, i.e. it does not depend on the initial condition. In particular, this average is equivalent to that of the running cost at the stationary state:

$$\mathbb{E}[C_u | X_0 = x] = \mu = \int dx \rho_{\text{eq}}(x) \left( \frac{\epsilon}{2} |u(t)|^2 + q(x(t)) \right) \quad (\text{S4})$$

We can introduce the value function

$$J(x) = - \lim_{T \rightarrow \infty} \mathbb{E} \left[ \int_0^T dt' \left( \frac{\epsilon}{2} |u(t')|^2 + q(x(t')) - \mu \right) \middle| x_0 = x \right] \quad (\text{S5})$$

that is (minus) the excess cumulated cost from a given state relative to the steady state average. We can use the Feynman-Kac formula [46], to show that this satisfies

$$-D \nabla^2 J - (u - \nabla V) \cdot \nabla J + q + \frac{\epsilon}{2} u^2 = \mu. \quad (\text{S6})$$

It can be verified by multiplying by the steady state (equilibrium) distribution  $\rho_{\text{eq}}$ , satisfying  $(u - \nabla V) \rho_{\text{eq}} = D \nabla \rho_{\text{eq}}$ , and integrating over all states. The principle of dynamic programming holds that in order to minimize  $\mu$ , it is sufficient to minimize  $J(x)$  for every  $x$ . We therefore see that the minimum condition for  $J$  yields

$$u^* = \frac{1}{\epsilon} \nabla J^* \quad (\text{S7})$$

690 and that the optimal value function  $J^*$  satisfies the Bellman equation

$$-D\nabla^2 J^* - \frac{1}{2\epsilon} |\nabla J^*|^2 + \nabla V \cdot \nabla J^* + q = \mu^* . \quad (\text{S8})$$

691 The constant  $\mu^*$  is the minimum average cost at the stationary state.

692 By replacing  $J^* = \epsilon(V + 2D \log \psi)$  this rewrites

$$-D\nabla^2 \psi + \left( \frac{q}{2D\epsilon} + \frac{|\nabla V|^2}{4D} - \frac{\nabla^2 V}{2} \right) \psi = \frac{\mu^*}{2D\epsilon} \psi \quad (\text{S9})$$

693 This is formally equivalent to the ground-state problem of a quantum particle of mass  $m = 2D/\hbar^2$  in the potential

$$V_S = \frac{q}{2D\epsilon} + \frac{|\nabla V|^2}{4D} - \frac{\nabla^2 V}{2} . \quad (\text{S10})$$

694 The change of variables implies that the optimally controlled dynamics is given by

$$\frac{dx}{dt} = 2D \nabla \log \psi + \sqrt{2D} \eta . \quad (\text{S11})$$

695 From the Fokker-Planck equation associated to Eq. (S11),

$$\partial_t \rho + \nabla \cdot (2D \rho \nabla \log \psi - D \nabla \rho) = 0 \quad (\text{S12})$$

696 we see that the function  $\psi$  is related to the equilibrium steady-state distribution,  $\rho_{\text{eq}} \propto \psi^2$ .

697 This ground-state problem can be solved by introducing a fictitious dynamics in imaginary time,

$$\partial_s \tilde{\psi} = -\hat{H} \tilde{\psi} \quad (\text{S13})$$

698 with the Hermitian operator  $\hat{H} = -D\nabla^2 + V_S$ . The ground state  $\psi_0$  of the Hamiltonian  $\hat{H}$  is the slowest mode in the  
699 imaginary time evolution, and in the long-time limit, Eq.(S13) is solved by

$$\tilde{\psi} \rightarrow e^{-E_0 s} \psi_0 \quad (\text{S14})$$

700 The solution of the HJB equation,  $\psi$ , then identifies with  $\tilde{\psi}$ , up to a scaling factor which depends solely on time.  
701 From the rate of change of the norm of  $\tilde{\psi}$  we can infer the minimum average cost:

$$\mu^* = 2D\epsilon E_0 = -2D\epsilon \lim_{s \rightarrow \infty} \partial_s \log \|\tilde{\psi}\|_2 . \quad (\text{S15})$$

702

### b. Exponential discounting

703 The control can also be chosen to minimize a cost over a shorter window of time, rather than at the steady-state.  
704 This can be done by introducing an exponential discount factor over time, as in

$$C_u = \int_0^\infty dt e^{-t/\tau} \left( \frac{\epsilon}{2} |u(t)|^2 + q(x(t)) \right) \quad (\text{S16})$$

705 where  $\tau$  sets a typical time scale over which rewards are accumulated in the future. As in the above case, we seek  $u$   
706 that minimizes the expectation value  $\mathbb{E}[C_u]$  over the stochastic dynamics.

707 We can introduce the value function as (minus) the expected discounted cost-to-go from a given state at a given  
708 time

$$J(x, t) = - \lim_{T \rightarrow \infty} \mathbb{E} \left[ \int_t^T dt' e^{-(t'-t)/\tau} \left( \frac{\epsilon}{2} |u(t')|^2 + q(x(t')) \right) \middle| x_t = x \right] \quad (\text{S17})$$

709 We see that this satisfies

$$-D\nabla^2 J - (u - \nabla V) \cdot \nabla J + \tau^{-1} J + q + \frac{\epsilon}{2} u^2 = 0 . \quad (\text{S18})$$

710 The optimality condition requires the control to be given by  $u^* = \epsilon^{-1} \nabla J$ , and optimality Bellman equation writes

$$-D \nabla^2 J^* - \frac{1}{2\epsilon} |\nabla J^*|^2 + \tau^{-1} J^* + \nabla V \cdot \nabla J^* + q = 0. \quad (\text{S19})$$

711 Analogously to the above case, with the transformation  $J^* = \epsilon(V + 2D \log \psi)$ , the Bellman equation takes the form

$$\hat{H}\psi \equiv -D \nabla^2 \psi + \left( \frac{q}{2D\epsilon} + \frac{|\nabla V|^2}{4D} - \frac{\nabla^2 V}{2} + \tau^{-1} \left( \frac{V}{2D} + \log \psi \right) \right) \psi = 0 \quad (\text{S20})$$

712 This non-linear Schrödinger equation can be solved numerically in a similar way as above, by introducing a fictitious  
713 dynamics in imaginary time, Eq. (S13), and solving it until convergence to the stationary state  $\hat{H}\psi = 0$ .

714 *c. Terminal cost and discounting*

715 For a process that terminates with a probability per unit time  $\tau^{-1}$  (or, in other terms, the probability density  
716 function for the terminal time is exponential, with mean  $\tau$ ), the exponential discount factor corresponds to the  
717 probability that a process that started at time  $t$  has not yet terminated at time  $t'$ :

$$\text{Prob}\{\text{not yet terminated after } \Delta t\} = \int_{\Delta t}^{\infty} \frac{dt}{\tau} e^{-t/\tau} = e^{-\Delta t/\tau} \quad (\text{S21})$$

718 Therefore, the average of the cost  $C_u$  in Eq.(S16) is equivalent to that of

$$\tilde{C}_u = \int_0^T dt \left( \frac{\epsilon}{2} |u(t)|^2 + q(x(t)) \right) \quad (\text{S22})$$

719 where  $T$  is the exponentially-distributed terminal time with mean  $\tau$ .

720 For the dynamics with a terminal state (time), we can include a terminal cost at the time  $T$ ,  $Q(x(T))$ . This is  
721 particularly relevant in the case of the cell-fate decision or the patterning example considered in the main text.

722 We can change the definition of the value function in Eq. (S17) by subtracting the contribution from the terminal  
723 cost. This can be written as

$$\mathbb{E}[Q(x(T)) | x_t = x] = \int_t^{\infty} dT \tau^{-1} e^{-(T-t)/\tau} \mathbb{E}_{x_T=x'} [Q(x') | x_t = x] \quad (\text{S23})$$

724 Together with the expression in Eq. (S17), the value for the task including the terminal cost can be expressed as

$$J(x, t) = - \lim_{T \rightarrow \infty} \mathbb{E} \left[ \int_t^T dt' e^{-(t'-t)/\tau} \left( \frac{\epsilon}{2} |u(t')|^2 + q(x(t')) + \tau^{-1} Q(x(t')) \right) \middle| x_t = x \right]. \quad (\text{S24})$$

725 Therefore, we recognise that the addition of the terminal cost is equivalent to the replacement of the state-dependent  
726 running cost  $q$  by  $\tilde{q} = q + \tau^{-1} Q$  in Eq. (S16).

727 If we choose the terminal cost to be given by the same function  $q$  (the dimensions do not match, so we understand  
728 that  $Q$  is equal to  $q$  multiplied by a unit time constant), then  $\tilde{q} = (1 + \tau^{-1}) q$ . Since the optimal solution is invariant  
729 upon multiplications of the cost function by a global constant (see Eq. (S7)), the problem is equivalent to the one  
730 where  $q$  is kept the same, but  $\tau$  enters as a rescaling of the trade-off parameter  $\epsilon$ , replaced by  $\tilde{\epsilon} = \epsilon / (1 + \tau^{-1})$ .

731 *d. First passage time near target*

732 The mean first passage time (MFPT) at a given point  $\bar{x}$ ,  $T_{\bar{x}}$  for a process starting at a point  $x < \bar{x}$ , is expressed as

$$\langle T_{\bar{x}}(x) \rangle = \mathbb{E} \left[ \int_0^{\infty} dt' 1_{x_t = \bar{x}} \right], \quad (\text{S25})$$

733 where the region  $x \geq \bar{x}$  is replaced by absorbing states (viceversa if  $x > \bar{x}$ ). For the optimally control dynamics given  
734 in Eq. (S11), this satisfies [46]

$$2D \frac{d}{dx} \log \psi \cdot \frac{d}{dx} \langle T_{\bar{x}}(x) \rangle + D \frac{d^2}{dx^2} \langle T_{\bar{x}}(x) \rangle = -1. \quad (\text{S26})$$

735 Its solution can be found by explicit quadratures, with the boundary conditions  $\langle T_{\bar{x}}(\bar{x}) \rangle = 0$  and  $\langle T_{\bar{x}}(x \rightarrow -\infty) \rangle = \infty$ ,

$$\langle T_{\bar{x}}(x) \rangle = \frac{1}{D} \int_x^{\bar{x}} dx' \int_{-\infty}^{x'} dx'' \frac{\psi(x'')^2}{\psi(x')^2} \quad (\text{S27})$$

736 By interpreting  $\psi^2 = \exp(-V_{\text{eff}}/D)$ , we have

$$\langle T_{\bar{x}}(x) \rangle = \frac{1}{D} \int_x^{\bar{x}} dx' \int_{-\infty}^{x'} dx'' \exp-(V_{\text{eff}}(x'') - V_{\text{eff}}(x'))/D \quad (\text{S28})$$

737 When  $V_{\text{eff}}$  has two minima, in the small- $D$  limit, Eq. (S28) recovers the Freidlin-Wentzel theory of stochastic transitions  
738 via the saddle-point approximation [46, 47].

739

### Low control and diffusion limit

740 For small values of  $u$ , the controlled potential  $V(x, u)$  still has two minima, corresponding to the stable fixed points  
741 of the controlled dynamics. If  $D$  is also small, the transitions between the two fixed points are rare, while typical  
742 realisations of the noise will produce small fluctuations around these: in this limit, Eq. (S28) gives the Freidlin-Wentzel  
743 theory of stochastic transitions [47], where the MFPT from the left minimum  $x_-$  to the right minimum  $x_+$  is therefore  
744 approximated as

$$\langle T_{x_+}(x_-) \rangle \simeq \frac{1}{D} e^{\Delta V_{\text{eff}}/D} \quad (\text{S29})$$

745 where  $\Delta V_{\text{eff}} = V_{\text{eff}}(x_0) - V_{\text{eff}}(x_-)$ , with  $x_0$  denoting the local maximum of the potential (or saddle) between the two  
746 minima. The rate for the opposite transition is analogously given by swapping  $x_- \leftrightarrow x_+$ .

747 The steady-state probability to be near one or the other fixed point is given by the average exit time from the fixed  
748 point attractor. In the present example, this can be calculated as the MFPT from  $x_- \simeq -1$  to  $x_+ \simeq 1$ , and vice  
749 versa.

750 First of all, we need to solve for the stationary points at a given value of  $u$ . In the linear approximation in  $u$ , these  
751 are

$$x_{\pm} \simeq \pm 1 + u/2 \quad (\text{stable}) \quad \text{and} \quad x_0 \simeq -u \quad (\text{unstable}) \quad (\text{S30})$$

752 The value of the potential at these points is

$$V(x_{\pm}, u) \simeq -1/4 \mp u, \quad V(x_0, u) \simeq 0 \quad (\text{S31})$$

753 The MFPT for the “reverse” transition,  $\langle T_{x_-}(x_+) \rangle$ , and the MFPT for the “forward” one,  $\langle T_{x_+}(x_-) \rangle$ , are given by  
754 Eq. (S29), and their ratio gives the relative probability to be in the right or the left attractor at steady state:

$$\frac{\rho_+}{\rho_-} \simeq \frac{\langle T_{x_-}(x_+) \rangle}{\langle T_{x_+}(x_-) \rangle} \simeq e^{2u/D}. \quad (\text{S32})$$

755 Therefore, we see that when  $D \ll 1$ , for a range of control in the regime  $D \ll |u| \ll 1$ , the probability distribution is  
756 highly skewed towards one of the two attractors.

757

## SI-2. Environment dynamics

758

### a. Ventral neural-progenitor GRN model (PONI network)

759 We outline here the details of the GRN model first presented in [13], with the addition of noise through the chemical  
760 Langevin equation approximation [8, 22].

761 We denote by  $H^+$  the Hill function

$$H^+(x) = \frac{x}{1+x}, \quad (\text{S33})$$

762 and by the latin letters the concentrations of the transcription factors, i.e.  $P \equiv [\text{Pax6}]$ ,  $O \equiv [\text{Olig2}]$ ,  $N \equiv [\text{Nkx2.2}]$ ,  
 763  $I \equiv [\text{Irx3}]$ ,  $A \equiv [\text{GliA}]$ ,  $R \equiv [\text{GliR}]$ . The dynamics of the four genes in the ventral neural tube GRN is described by  
 764 the following system of first order ODEs:

$$\begin{aligned}
 \frac{dP}{dt} &= \alpha_{\text{Pax}} H^+ \left( \frac{K_{\text{Pax,Pol}} c_{\text{Pol}}}{(1 + K_{\text{Pax,Oli}} O)^2 (1 + K_{\text{Pax,Nkx}} N)^2} \right) - \beta_{\text{Pax}} P \\
 \frac{dO}{dt} &= \alpha_{\text{Oli}} H^+ \left( \frac{K_{\text{Oli,Pol}} c_{\text{Pol}}}{(1 + K_{\text{Oli,Nkx}} N)^2 (1 + K_{\text{Oli,Irx}} I)^2} \frac{1 + f_A K_{\text{Oli,GliA}} A}{1 + K_{\text{Oli,Gli}} (A + R)} \right) - \beta_{\text{Oli}} O \\
 \frac{dN}{dt} &= \alpha_{\text{Nkx}} H^+ \left( \frac{K_{\text{Nkx,Pol}} c_{\text{Pol}}}{(1 + K_{\text{Nkx,Pax}} P)^2 (1 + K_{\text{Nkx,Oli}} O)^2 (1 + K_{\text{Nkx,Irx}} I)^2} \times \right. \\
 &\quad \left. \times \frac{1 + f_A K_{\text{Nkx,GliA}} A}{1 + K_{\text{Nkx,Gli}} (A + R)} \right) - \beta_{\text{Nkx}} N \\
 \frac{dI}{dt} &= \alpha_{\text{Irx}} H^+ \left( \frac{K_{\text{Irx,Pol}} c_{\text{Pol}}}{(1 + K_{\text{Oli,Irx}} O)^2 (1 + K_{\text{Nkx,Irx}} N)^2} \right) - \beta_{\text{Irx}} I
 \end{aligned} \tag{S34}$$

765 where  $K_{X,Y}$  is the binding affinity of the TF/species Y onto its site on gene X,  $f_A$  is the binding cooperativity factor  
 766 for Gli activator,  $c_{\text{Pol}}$  is the (constant) concentration of RNAP,  $\alpha_X$  are the maximum production rates, and  $\beta_X$  the  
 767 degradation rates.

768 As in [8], we add (multiplicative) noise via the chemical Langevin equation (CLE) approximation [22] to the right-  
 769 hand side of Eqs. (S34). The overall size of the fluctuations is controlled by the inverse system size parameter,  $\Omega^{-1}$ .  
 770 For instance, for Pax6, the multiplicative noise is modelled by

$$\Omega^{-1/2} \left[ \alpha_{\text{Pax}} H^+ \left( \frac{K_{\text{Pax,Pol}} c_{\text{Pol}}}{(1 + K_{\text{Pax,Oli}} O)^2 (1 + K_{\text{Pax,Nkx}} N)^2} \right) + \beta_{\text{Pax}} P \right]^{1/2} \tag{S35}$$

771 (i.e. the sum of production and degradation rates for the gene of interest, scaled by the inverse system size, under  
 772 square root) multiplied by a standard Gaussian white noise, independent for each gene.

773 See Table I for the parameter values used.

775

### b. Dynamics of a stochastic gradient

776 In the patterning task, we also include a dynamics for the morphogen gradient. We simulate a non-stationary  
 777 stochastic field  $\hat{S}_{x,t}$ , as the empirical number density field  $\hat{S}_{x,t} = \sum_i \delta(\hat{X}_t^i - x)$  associated to a stochastic reaction-  
 778 diffusion with

$$d\hat{X}_t^i = \sqrt{2D} dW_t^i \tag{S36}$$

779 and where particles are removed with independent rates  $\kappa$  and added at  $x_0$  with rate  $J_0$ . The SDE in Eq. (S36)  
 780 provides an explicit method to simulate the spatio-temporal dynamics of the stochastic field  $\hat{S}_{x,t}$ . To do so, we  
 781 simulate trajectories of Eq. (S36) via, e.g. Euler-Maruyama method, with time discretisation  $dt$ , that is

$$X_{t+dt}^i = X_t^i + \sqrt{2D} dt g_t^i \tag{S37}$$

782 with  $g_t^i$  a normal-distributed random number with mean 0 and covariance  $\langle g_t^i g_{t'}^j \rangle = \delta_{i,j} \delta(t - t')$ ; in the time step  
 783 between  $t$  and  $t + dt$ , each particle is eliminated with probability  $\kappa dt$ , and a burst of  $n_b$  new particles is added at  
 784  $x_0 < 0$  with probability  $J_0 dt/n_b$  (so that  $J_0$  is the overall average production rate, but with burst size  $n_b$ ). The  
 785 number density field can be then defined with a spatial resolution  $dx$ , as the count of the number of particles within  
 786  $[x - dx/2, x + dx/2]$ , divided by  $dx$ . The resolution  $dx$  is chosen to be the single-cell size.

787 We set the parameters of the dynamics as follows. 81 cells are aligned along one axis within  $[0, 1]$ , so  $dx = 1/80$ . The  
 788 time discretization  $dt$  is chosen as 5 times smaller than that for the PONI network, but configurations are taken every  
 789 5 steps. The free parameters of the dynamics must set a time scale, a length scale and a typical number of particles.  
 790 We set the overall time scale of the process through the degradation rate  $\kappa$ . The length scale is the decay length  $\lambda$   
 791 of the average gradient profile at steady state,  $\langle \hat{S}_{x,t \rightarrow \infty} \rangle \propto \exp -|x - x_0|/\lambda$ . This is fixed to 0.15 in all simulations,  
 792 consistently with experimental measures [16]. This decay length can be derived analytically to be  $\lambda = \sqrt{D/\kappa}$ , from  
 793 which we fix the diffusion constant accordingly to be  $D = \kappa \lambda^2$ . The typical density is chosen to be the average

| Concentrations $\sim [\text{conc}]$                     |                                     |       |
|---------------------------------------------------------|-------------------------------------|-------|
| $c_{\text{Pol}}$                                        | RNAp concentration                  | 0.8   |
| Binding affinities $\sim [\text{conc}]^{-1}$            |                                     |       |
| $K_{\text{Pax,Pol}}$                                    | Binding affinity of RNAp to Pax6    | 4.8   |
| $K_{\text{Oli,Pol}}$                                    | Binding affinity of RNAp to Olig2   | 47.8  |
| $K_{\text{Nkx,Pol}}$                                    | Binding affinity of RNAp to Nkx2.2  | 27.4  |
| $K_{\text{Irx,Pol}}$                                    | Binding affinity of RNAp to Irx3    | 23.4  |
| $K_{\text{Oli,Gli}}$                                    | Binding affinity of Gli to Olig2    | 18.0  |
| $K_{\text{Nkx,Gli}}$                                    | Binding affinity of Gli to Nkx2.2   | 373.0 |
| $K_{\text{Pax,Oli}}$                                    | Binding affinity of Olig2 to Pax6   | 1.9   |
| $K_{\text{Nkx,Oli}}$                                    | Binding affinity of Olig2 to Nkx2.2 | 27.1  |
| $K_{\text{Oli,Nkx}}$                                    | Binding affinity of Nkx2.2 to Olig2 | 60.6  |
| $K_{\text{Nkx,Pax}}$                                    | Binding affinity of Pax6 to Nkx2.2  | 4.8   |
| $K_{\text{Pax,Nkx}}$                                    | Binding affinity of Nkx2.2 to Pax6  | 26.7  |
| $K_{\text{Oli,Irx}}$                                    | Binding affinity of Irx3 to Olig2   | 28.4  |
| $K_{\text{Irx,Oli}}$                                    | Binding affinity of Olig2 to Irx3   | 58.8  |
| $K_{\text{Nkx,Irx}}$                                    | Binding affinity of Irx3 to Nkx2.2  | 47.1  |
| $K_{\text{Irx,Nkx}}$                                    | Binding affinity of Nkx2.2 to Irx3  | 76.2  |
| Cooperativity coefficients and noise intensity $\sim 1$ |                                     |       |
| $f_A$                                                   | Activation constant                 | 10.0  |
| $\Omega^{-1}$                                           | Noise intensity                     | 0.005 |
| Degradation rates $\sim [\text{time}]^{-1}$             |                                     |       |
| $\beta_{\text{Pax}}$                                    | Degradation rate of Pax6            | 2.0   |
| $\beta_{\text{Oli}}$                                    | Degradation rate of Olig2           | 2.0   |
| $\beta_{\text{Nkx}}$                                    | Degradation rate of Nkx2.2          | 2.0   |
| $\beta_{\text{Irx}}$                                    | Degradation rate of Irx3            | 2.0   |
| Production rates $\sim [\text{conc}][\text{time}]^{-1}$ |                                     |       |
| $\alpha_{\text{Pax}}$                                   | Maximum production rate of Pax6     | 2.0   |
| $\alpha_{\text{Oli}}$                                   | Maximum production rate of Olig2    | 2.0   |
| $\alpha_{\text{Nkx}}$                                   | Maximum production rate of Nkx2.2   | 2.0   |
| $\alpha_{\text{Irx}}$                                   | Maximum production rate of Irx3     | 2.0   |

TABLE I. Parameters of the GRN model. Dimensionality of the constants are indicated in the header to every section.

794 number density at  $x = 0$  at steady state, which is  $N_0 = J_0 e^{-|x_0|}/2\kappa\lambda$ . With a fixed burst rate  $r = J_0/n_b = 50$ , we  
 795 modulate the burst size  $n_b$  by inverting the expression for  $N_0$ .

796 The ensemble average of the field  $\langle S \rangle$ , satisfies the PDE

$$\partial_t \langle S \rangle - D \nabla^2 \langle S \rangle + \kappa \langle S \rangle = J_0 \delta(x - x_0) \quad (\text{S38})$$

797 By integrating the spatial part, we can write

$$\partial_t \langle S \rangle = J_0 \frac{\exp\left\{-\left\{\kappa t + \frac{(x-x_0)^2}{4Dt}\right\}\right\}}{\sqrt{4\pi Dt}}. \quad (\text{S39})$$

798 In Eq. (S39), the spatial variable enters only parametrically and the dynamics can be described as an ODE with time-  
 799 dependent production rates. Therefore, (ensemble) averages of the signal experienced at different spatial locations  
 800 can be regarded as “independent”, but at the expense of allowing non-autonomous dynamics for the local signal.

801 Parameters used for the simulations in this work are  $\lambda = 0.15$  (in units of D-V axis length),  $\kappa = 0.5$  (equal to  $\beta/4$   
 802 – See Tab. I), and  $N_0 = 5000$ .

803

### SI-3. Multi-Agent control

804 Here we derive the Bellman equation for the multi-agent (MA) case. The equations are written for the discrete-  
 805 time and discrete-state case – as it is more transparent for a reinforcement learning implementation – but are easily  
 806 generalized to continuous space and/or time. The notation is as follows:

- 807 • cell index,  $i$  (the  $\bar{\cdot}$  notation indicates arrays indexed by cells)

- 808 • cell state, including gene expression and extracellular signal levels,  $x_i \in \mathbb{R}^D$  ( $\bar{x}$ )
- 809 • target expression,  $\xi_i \in \mathbb{R}^D$  ( $\bar{\xi}$ )
- 810 • intracellular signal,  $u_i \in \mathbb{R}^K$  ( $\bar{u}$ )
- 811 • M-A policy,  $\bar{u} \sim \Pi(\cdot | \bar{x})$ , where  $\Pi(\bar{u} | \bar{x}) \equiv \prod_i \pi(u_i | x_i)$
- 812 • model of the environment,  $\bar{x}' \sim P(\cdot | \bar{x}, \bar{u})$

813 *a. Full multi-agent case*

814 The multi-agent probability distribution at time  $t$ ,  $\rho_t(\bar{x})$ , satisfies the forward Kolmogorov equation

$$\rho_{t+1}(\bar{x}) = \sum_{\bar{x}', \bar{u}'} P(\bar{x} | \bar{x}', \bar{u}') \Pi(\bar{u}' | \bar{x}') \rho_t(\bar{x}') \quad (\text{S40})$$

815 The goal of the agents is to maximize the expectation value of the discounted return (in the decision-making and  
816 reinforcement learning literature, it is more customary to express the goal in terms of maximisation of *rewards*, rather  
817 than minimisation *costs*):

$$R_t = \sum_{t'=0}^{\infty} \gamma^{t'} r_{t+t'} \quad (\text{S41})$$

818 with

$$r_t = r(\bar{x}^t, \bar{u}^t) \quad (\text{S42})$$

819 In the end, we will be interested in a reward of the form

$$r(\bar{x}, \bar{u}) = -q_{\bar{\xi}}(\bar{x}) - \frac{\epsilon}{2} \|\bar{u}\|^2 \quad (\text{S43})$$

820 where, e.g.  $q_{\bar{\xi}}(\bar{x}) = \|\bar{x} - \bar{\xi}\|^2/2$ . This negative reward is a cost that penalises certain configurations of the MA system  
821 –implementing the requirement to reach the target– and high values of control.

822 The objective function  $\mathcal{J}_{\Pi} = \mathbb{E}_{\Pi}[R_0]$ , that is the ensemble average of  $R_0$  over the trajectories generated by the  
823 policy  $\Pi$ , writes

$$\begin{aligned} \mathcal{J}_{\Pi} &= \sum_t \gamma^t \sum_{\bar{x}, \bar{u}, \bar{x}'} P(\bar{x}' | \bar{x}, \bar{u}) \Pi(\bar{u} | \bar{x}) \rho_t(\bar{x}) r(\bar{x}, \bar{u}) \\ &= \sum_{\bar{x}, \bar{u}, \bar{x}'} P(\bar{x}' | \bar{x}, \bar{u}) \Pi(\bar{u} | \bar{x}) \eta(\bar{x}) r(\bar{x}, \bar{u}) \end{aligned} \quad (\text{S44})$$

824 where  $\eta$  is the discounted occupancy

$$\eta(\bar{x}) = \sum_{t=0}^{\infty} \gamma^t \rho_t(\bar{x}) \quad (\text{S45})$$

825 We can introduce the *quality* (or *state-action value*) function, which is the expectation value of the return conditioned  
826 on the initial state and action,  $Q_{\Pi}^t(\bar{x}, \bar{u}) = \mathbb{E}[R_t | \bar{x}^t = \bar{x}, \bar{u}^t = \bar{u}]$ . We can write a recursive equation of the value  
827 function  $Q_{\Pi}^t$ , expressing the conditional expectation value  $\mathbb{E}[R_t | \bar{x}, \bar{u}]$  by making use of Eq. (S40):

$$Q_{\Pi}^t(\bar{x}, \bar{u}) = \sum_{\bar{x}'} P(\bar{x}' | \bar{x}, \bar{u}) \left\{ r(\bar{x}, \bar{u}) + \gamma \sum_{\bar{u}'} \Pi(\bar{u}' | \bar{x}') Q_{\Pi}^{t+1}(\bar{x}', \bar{u}') \right\}. \quad (\text{S46})$$

828 Since there is no finite horizon and neither rewards nor transition probabilities depend explicitly on time, we can seek  
829 for a stationary solution  $Q_{\Pi}^t = Q_{\Pi}$ .



830 The principle of dynamic programming [41, 48] consists in maximizing the expected return –i.e. the objective  
 831 function  $J_{\Pi}$ – by maximizing its conditional expectation at intermediate times, that is the value function. The optimal  
 832 policy  $\Pi^*$ , then, is given in terms of the quality function as

$$\Pi^*(\bar{u} | \bar{x}) = \delta_{\bar{u}, \bar{u}^*(\bar{x})}, \quad \text{with } \bar{u}^*(\bar{x}) = \operatorname{argmax}_{\bar{u}} Q^*(\bar{x}, \bar{u}) \quad (\text{S47})$$

833 where the optimal quality function satisfies the Bellman equation

$$Q^*(\bar{x}, \bar{u}) = \sum_{\bar{x}'} P(\bar{x}' | \bar{x}, \bar{u}) \left\{ r(\bar{x}, \bar{u}) + \gamma \max_{\bar{u}'} Q^*(\bar{x}', \bar{u}') \right\}. \quad (\text{S48})$$

834 *b. Independent agents*

835 To reflect the requirement of each agent individually to reach their own target, we write  $q_{\bar{\xi}}(\bar{x}) = \sum_i q_{\xi_i}(x_i)$ , where  
 836  $q_{\xi}$  is some convex function that has a minimum at  $\xi$ . This is true for the cost rate  $q_{\bar{\xi}}(\bar{x}) = \|\bar{\xi} - \bar{x}\|_2^2 = \sum_i \|\xi_i - x_i\|_2^2$ .  
 837 So, the instantaneous reward for the MA system is the sum of rewards for the individual agents,  $c_i$ , that are functions  
 838 of the single agent’s observations and actions:

$$r_i(x, u) = -q_{\xi_i}(x) - \frac{\epsilon}{2} \|u\|^2 \quad (\text{S49})$$

839 As discussed above, the MA policy  $\Pi$  with respect to which we want to optimize the performance is of the form

$$\Pi(\bar{u} | \bar{x}) = \prod_{i=1}^N \pi(u_i | x_i) \quad (\text{S50})$$

840 that is, actions by individual agents are chosen independently according to the same single-agent policy  $\pi$ . We seek  
 841 for solutions of the Bellman equation of the form

$$Q_{\Pi}^t(\bar{x}, \bar{u}) = \sum_{i=1}^N Q_{\pi}^t(x_i, u_i). \quad (\text{S51})$$

842 By replacing Eqs. (S50) and (S51), into the Bellman equation (S46), we have

$$\sum_{\bar{x}'} P(\bar{x}' | \bar{x}, \bar{u}) \sum_i \left\{ r(x_i, u_i) + \gamma \sum_{u'_i} \pi(u'_i | x'_i) Q_{\pi}^{t+1}(x'_i, u'_i) - Q_{\pi}^t(x_i, u_i) \right\} = 0. \quad (\text{S52})$$

843 Optimality, in this approximation, is

$$\pi^*(\cdot | x) = \delta_{u, u^*(x)}, \quad \text{with } u^*(x) = \operatorname{argmax}_u Q^*(x, u) \quad (\text{S53})$$

844 where  $Q^*$  denotes the optimal quality function solving

$$\sum_{\bar{x}'} P(\bar{x}' | \bar{x}, \bar{u}) \sum_i \left\{ r(x_i, u_i) + \gamma \max_{u'_i} Q^*(x'_i, u'_i) - Q^*(x_i, u_i) \right\} = 0. \quad (\text{S54})$$

845 This is approximately solved by minimizing the expectation of the square MA error

$$\Delta_Q(\bar{x}', \bar{x}, \bar{u})^2 = \sum_i \left\{ r(x_i, u_i) + \gamma \max_{u'_i} Q(x'_i, u'_i) - Q(x_i, u_i) \right\}^2 \quad (\text{S55})$$

846 with respect to the  $Q$ ,

$$Q^* \simeq \operatorname{argmin}_Q \sum_{\bar{x}'} P(\bar{x}' | \bar{x}, \bar{u}) \Delta_Q(\bar{x}', \bar{x}, \bar{u})^2. \quad (\text{S56})$$

847

c. Memory in signal interpretation

848 The independent-agent ansatz is exact when the transition probabilities  $P(\bar{x}'|\bar{x}, \bar{u})$  can be factorized into single-agent  
849 transition probabilities

$$P(\bar{x}'|\bar{x}, \bar{u}) = \prod_{i=1}^N p_i(x'_i|x_i, u_i), \quad (\text{S57})$$

850 that is, when the dynamics of each agent is independent. This can be seen intuitively for a static and deterministic  
851 gradient. In such case, the (constant) value of the morphogen signal at the location of a given cell enters as a  
852 parameter in the quality function  $Q$ : it's role is to “select” the specific single-agent problem for that particular cell.  
853 This effectively makes the MA task trivially decomposed into single-agent ones. If the gradient is stochastic and with  
854 a small noise, we could argue that the same holds in a probabilistic sense when the morphogen is at steady state or  
855 reaches it very fast (high  $\kappa$ ). In general, when the morphogen gradient is modelled as a diffusion-degradation process  
856 –as in this case– this approximation is not valid. One can show that the average of the concentration field over the  
857 noise,  $\langle S \rangle$ , can be calculated as the solution of independent differential equations with local time-dependent rates (see  
858 Eq. (S39)). So, even though we may be able to express the average dynamics of the morphogen at individual cells  
859 locations as independent, 1) fluctuations will anyway be correlated and 2) we do so at the cost of introducing time  
860 dependence.

861 Here, we assume that it is possible to approximate the transition probability  $P$  by a factorized form as in Eq. (S57),  
862 at the expense of introducing auxiliary variables  $\{M\}_{h=1}^{N_{\text{mem}}}$ , included in the “state” of the single cell along with its  
863 gene expression  $G$  and the local morphogen signal  $S$ . These memory variables integrate over time the extracellular  
864 signal  $S$  and that model the effective memory. We model these as the species in a signalling cascade, whereby  $S$   
865 directly influences the production of  $M_1$ , which in turn affects production of  $M_2$  etc.,

$$\begin{aligned} \tau_M \frac{dM_1}{dt} &= r_1 S - M_1 \\ \tau_M \frac{dM_h}{dt} &= r_h M_{h-1} - M_h, \quad \text{for } h > 1 \end{aligned} \quad (\text{S58})$$

866 where  $S$  is the local morphogen concentration, and  $r_h$  are components of the control vector  $u$ , therefore functions of  
867 the single cell state variables – bound between  $\pm 1$ . We choose the overall time constant  $\tau_M = 1$ . Notice that the  
868 dependence of the production rate for the memory variable  $M_h$  depends at least linearly on  $M_{h-1}$ : therefore, the  
869 control can modulate the production rates of the memory variables, but cannot be arbitrarily large for small signals.

870

SI-4. RL solution

871 The approximate solution of Eq. (S52) via reinforcement learning (RL) requires the sampling of the tuples  
872  $(\bar{x}^t, \bar{u}^t, r^t, \bar{x}^{t+1})$ . State-of-the-art deep-RL algorithms — such as DQN [43], DDPG [49], TD3 [25], SAC [50] etc—  
873 solve the problem of the stability of learning by storing a replay buffer  $\mathcal{B}$  with the last  $N_{\text{replay}}$  tuples visited, and  
874 estimating gradients of the loss functions by averaging over a small number  $N_{\text{batch}}$  (batch size) of them.

875 Here we use TD3 [25], which is an actor-critic deep-RL algorithm, designed for continuous control problems.  
876 Similar to other actor-critic algorithm, it stores function approximators for both the policy (actor), and the value  
877 (critic) function. These are represented by deep neural networks with parameters  $\phi$  and  $\theta$ , respectively ( $\pi \simeq \pi_\phi$  and  
878  $Q \simeq Q_\theta$ ). In order to reduce the bias in the estimate of the value function  $Q$ , TD3 uses two critics ( $T$  for “twin”).<sup>1</sup>  
879 As in other deep-RL AC algorithms, in order to make learning more stable, TD3 stores two copies of each function  
880 approximator: the first is updated on-line; the second is used as target and integrates the first at a slow rate, and  
881 with delay. TD3 uses a SARSA-like target for the value function, by sampling the next action using the target policy.

882 We here use the TD3 algorithm for episodic tasks (see [25] for details). We use  $\alpha = 10^{-3}$ ,  $\beta = 10^{-3}$ . All other  
883 details are the same as in the original paper. The discount factor (which is a property of the task!)  $\gamma = 0.99$ , which  
884 for time step  $dt = 0.005$  corresponds to the exponential discount time in continuous time  $\tau \simeq 5$ .

885 In the case of the MA problem described above, we need to modify this algorithm by storing transitions of the  
886 MA system, defining a target for each individual agent (based on their single-agent rewards, states and actions), and

<sup>1</sup>In standard Q-learning, the value of the state after the transition is taken to be the maximum over all actions of the  $Q$  function, evaluated at that state, by bootstrapping. This is a problem that is present also in actor-critic algorithms like DDPG, where the “maximization over actions” is implicit in the policy-gradient formula. This typically leads to an overestimation of the value (as demonstrated in the paper).

---

**Algorithm 1** Twin Delayed Deep Deterministic (TD3) policy gradient for episodic tasks.

---

Initialize actor and critic networks with parameters  $\phi$ ,  $\theta_1$  and  $\theta_2$   
Initialize target networks:  $\phi' \leftarrow \phi$ ,  $\theta'_1 \leftarrow \theta_1$  and  $\theta'_2 \leftarrow \theta_2$   
Initialize replay buffer  $\mathcal{B}$   
Define exploration parameters  $\sigma$ , regularization parameter  $\tilde{\sigma}$ , target learning rate  $\tau$ , and optimizers learning rates  $\alpha$  and  $\beta$   
**for**  $N_{\text{ep}}$  episodes **do**:  
  Initialize agent in state  $x^0 \sim \rho_0$   
  **for**  $t = 0 \dots T - 1$  ( $T$  cutoff time) or until terminal state **do**  
    Select control,  $u^t = \pi_\phi(x^t) + \epsilon$ , with exploration noise  $\epsilon \sim \mathcal{N}(0, \sigma)$   
    Observe reward  $r^t$  and new state  $x^{t+1}$   
    Store the tuple  $(x^t, u^t, r^t, x^{t+1})$  in the buffer  $\mathcal{B}$   
    Sample  $N_{\text{batch}}$  random tuples  $(x, u, r, x')$  ▷ Averages over elements in the batch is denoted as  $\langle \cdot \rangle_{\text{batch}}$   
    For each of these, compute target  $y \leftarrow r + \gamma \min_{i \in \{1, 2\}} Q_{\theta'_i}(x', u')$ , where  $u' = \pi_{\phi'}(x') + \epsilon$ , with  $\epsilon \sim \mathcal{N}(0, \tilde{\sigma})$   
  
    Update the critic networks (“ $\leftarrow_\alpha$ ” indicates gradient-based optimizer with learning rate  $\alpha$ ):  
     $\theta_i \leftarrow_\alpha \nabla_{\theta_i} \langle (y - Q_{\theta_i}(x, u))^2 \rangle_{\text{batch}}$  ▷ “ $\leftarrow_\alpha$ ” indicates gradient-based optimizer with learning rate  $\alpha$   
  
    **if** episode multiple of  $d$  (delay) **then**  
      Update on-line policy network with deterministic policy gradient:  
       $\phi \leftarrow_\beta \nabla_\phi \langle \nabla_{u'} Q_{\theta_1}(x, u') \big|_{u'=\pi_\phi(x)} \nabla_\phi \pi_\phi(x) \rangle_{\text{batch}}$   
  
      Update the target networks:  
       $\phi' \leftarrow (1 - \tau)\phi' + \tau\phi$   
       $\theta'_i \leftarrow (1 - \tau)\theta'_i + \tau\theta_i$

---

887 averaging gradients over the agents as well. This is detailed in Alg. 2. The learning rates here are  $\alpha = 3 \times 10^{-5}$  and  
888  $\beta = 10^{-5}$ .

---

**Algorithm 2** Multi-Agent Twin Delayed Deep Deterministic (TD3) policy gradient for episodic tasks

---

Initialize actor and critic networks with parameters  $\phi$ ,  $\theta_1$  and  $\theta_2$   
Initialize target networks:  $\phi' \leftarrow \phi$ ,  $\theta'_1 \leftarrow \theta_1$  and  $\theta'_2 \leftarrow \theta_2$   
Initialize replay buffer  $\mathcal{B}$   
Define exploration parameters  $\sigma$ , regularization parameter  $\tilde{\sigma}$ , target learning rate  $\tau$ , and optimizers learning rates  $\alpha$  and  $\beta$   
**for**  $N_{\text{ep}}$  episodes **do**:  
  Initialize the  $N$  agents in state  $\bar{x}^0 \sim \rho_0$   
  **for**  $t = 0 \dots T - 1$  ( $T$  cutoff time) or until terminal state **do**  
    Select control,  $\bar{u}^t = \pi_\phi(\bar{x}^t) + \epsilon$ , with exploration noise  $\epsilon \sim \mathcal{N}(0, \sigma)$   
    Observe reward  $r^t$  and new state  $\bar{x}^{t+1}$   
    Store the tuple  $(\bar{x}^t, \bar{u}^t, \bar{r}^t, \bar{x}^{t+1})$  in the buffer  $\mathcal{B}$   
  
    Sample  $N_{\text{batch}}$  random tuples  $(\bar{x}, \bar{u}, \bar{r}, \bar{x}')$  ▷ Averages over elements in the batch is denoted as  $\langle \cdot \rangle_{\text{batch}}$   
    For each of these, and for each agent  $j$ ,  
    compute targets  $y_j \leftarrow r_j + \gamma \min_{i \in \{1, 2\}} Q_{\theta'_i}(x'_j, u'_j)$ , where  $u'_j = \pi_{\phi'}(x'_j) + \epsilon_j$ , with  $\epsilon_j \sim \mathcal{N}(0, \tilde{\sigma})$   
  
    Update the critic networks  
     $\theta_i \leftarrow_\alpha \nabla_{\theta_i} \langle N^{-1} \sum_{j=1}^N (y_j - Q_{\theta_i}(x_j, u_j))^2 \rangle_{\text{batch}}$  ▷ “ $\leftarrow_\alpha$ ” indicates gradient-based optimizer with learning rate  $\alpha$   
  
    **if** episode multiple of  $d$  (delay) **then**  
      Update on-line policy network with deterministic policy gradient:  
       $\phi \leftarrow_\beta \nabla_\phi \langle N^{-1} \sum_{j=1}^N \nabla_{u'} Q_{\theta_1}(x_j, u') \big|_{u'=\pi_\phi(x_j)} \nabla_\phi \pi_\phi(x_j) \rangle_{\text{batch}}$   
  
      Update the target networks:  
       $\phi' \leftarrow (1 - \tau)\phi' + \tau\phi$   
       $\theta'_i \leftarrow (1 - \tau)\theta'_i + \tau\theta_i$

---

- 891 [3] N. Balaskas, A. Ribeiro, J. Panovska, E. Dessaud, N. Sasai, K. M. Page, J. Briscoe, and V. Ribes, *Cell* **148**, 273 (2012),  
892 [arXiv:arXiv:1011.1669v3](#).
- 893 [4] J. Briscoe and S. Small, *Development* **142**, 3996 (2015).
- 894 [5] J. B. A. Green and J. Sharpe, *Development* **142**, 1203 (2015).
- 895 [6] Manu, S. Surkova, A. V. Spirov, V. V. Gursky, H. Janssens, A.-R. Kim, O. Radulescu, C. E. Vanario-Alonso, D. H. Sharp,  
896 M. Samsonova, and J. Reinitz, *PLOS Biol.* **7**, e1000049 (2009).
- 897 [7] Manu, S. Surkova, A. V. Spirov, V. V. Gursky, H. Janssens, A.-R. Kim, O. Radulescu, C. E. Vanario-Alonso, D. H. Sharp,  
898 M. Samsonova, and J. Reinitz, *PLOS Comput. Biol.* **5**, e1000303 (2009).
- 899 [8] K. Exelby, E. Herrera-Delgado, L. G. Perez, R. Perez-Carrasco, A. Sagner, V. Metzis, P. Sollich, and J. Briscoe, *Develop-*  
900 *ment* **148**, dev197566 (2021).
- 901 [9] M. Zagorski, Y. Tabata, N. Brandenberg, M. P. Lutolf, G. Tkačik, T. Bollenbach, J. Briscoe, and A. Kicheva, *Science* (80-  
902 ). **356**, 1379 (2017).
- 903 [10] A. D. Lander, *Science* (80- ). **339**, 923 (2013).
- 904 [11] J. Briscoe and J. Ericson, *Curr. Opin. Neurobiol.* **11**, 43 (2001).
- 905 [12] V. Ribes and J. Briscoe, *Cold Spring Harb. Perspect. Biol.* (2009).
- 906 [13] M. Cohen, K. M. Page, R. Perez-Carrasco, C. P. Barnes, and J. Briscoe, *Development* **141**, 3868 (2014).
- 907 [14] J. Jeong and A. P. McMahon, *Development* **132**, 143 (2005).
- 908 [15] M. Lek, J. M. Dias, U. Marklund, C. W. Uhde, S. Kurdija, Q. Lei, L. Sussel, J. L. Rubenstein, M. P. Matise, H. H. Arnold,  
909 T. M. Jessell, and J. Ericson, *Development* [10.1242/dev.054288](#) (2010).
- 910 [16] M. Cohen, A. Kicheva, A. Ribeiro, R. Blassberg, K. M. Page, C. P. Barnes, and J. Briscoe, *Nat. Commun.* **6**, 6709 (2015).
- 911 [17] C. H. Waddington, *The strategy of the genes* (Routledge, 1957).
- 912 [18] F. Corson and E. D. Siggia, *Proc. Natl. Acad. Sci.* **109**, 5568 (2012).
- 913 [19] F. Corson and E. D. Siggia, *Elife* **6**, e30743 (2017).
- 914 [20] M. Sáez, R. Blassberg, E. Camacho-Aguilar, E. D. Siggia, D. A. Rand, and J. Briscoe, *Cell Syst.* **13**, 12 (2022).
- 915 [21] P. S. Swain, M. B. Elowitz, and E. D. Siggia, *Proc. Natl. Acad. Sci.* **99**, 12795 (2002).
- 916 [22] D. T. Gillespie, *J. Chem. Phys.* **113**, 297 (2000), [arXiv:1508.04467](#).
- 917 [23] L. Bintu, N. E. Buchler, H. G. Garcia, U. Gerland, T. Hwa, J. Kondev, and R. Phillips, *Curr. Opin. Genet. Dev.*  
918 [10.1016/j.gde.2005.02.006](#) (2005), [arXiv:0412010 \[q-bio\]](#).
- 919 [24] R. S. Sutton and A. G. Barto, *Reinforcement learning: an introduction*. (MIT Press, 2018) p. 1054.
- 920 [25] S. Fujimoto, H. van Hoof, and D. Meger, *Addressing Function Approximation Error in Actor-Critic Methods* (2018),  
921 [arXiv:1802.09477 \[cs.AI\]](#).
- 922 [26] J. P. Junker, K. A. Peterson, Y. Nishi, J. Mao, A. P. McMahon, and A. van Oudenaarden, *Dev. Cell* **31**, 448 (2014).
- 923 [27] Y. Nishi, X. Zhang, J. Jeong, K. A. Peterson, A. Vedenko, M. L. Bulyk, W. A. Hide, and A. P. McMahon, *Dev.*  
924 [10.1242/dev.124636](#) (2015).
- 925 [28] E. Dessaud, L. L. Yang, K. Hill, B. Cox, F. Ulloa, A. Ribeiro, A. Mynett, B. G. Novitch, and J. Briscoe, *Nature* **450**, 717  
926 (2007).
- 927 [29] T. Rayon, S. Despina, P.-C. Ruben, G.-P. Lorena, B. Christopher, M. Manuela, E. Katherine, L. Jorge, T. V. L. J., F. E. M.  
928 C., and B. James, *Science* (80- ). **369**, eaba7667 (2020).
- 929 [30] G. Sorger, *J. Optim. Theory Appl.* **70**, 607 (1991).
- 930 [31] A. Graves, A. Mohamed, and G. Hinton, *Speech recognition with deep recurrent neural networks* (2013).
- 931 [32] M. Hausknecht and P. Stone, *Deep Recurrent Q-Learning for Partially Observable MDPs* (2015).
- 932 [33] G. Wayne, C.-C. Hung, D. Amos, M. Mirza, A. Ahuja, A. Grabska-Barwinska, J. Rae, P. Mirowski, J. Z. Leibo, A. Santoro,  
933 M. Gemici, M. Reynolds, T. Harley, J. Abramson, S. Mohamed, D. Rezende, D. Saxton, A. Cain, C. Hillier, D. Silver,  
934 K. Kavukcuoglu, M. Botvinick, D. Hassabis, and T. Lillicrap, *Unsupervised Predictive Memory in a Goal-Directed Agent*  
935 (2018), [arXiv:1803.10760 \[cs.LG\]](#).
- 936 [34] P. Gajane, R. Ortner, and P. Auer, *Variational Regret Bounds for Reinforcement Learning* (2019).
- 937 [35] Z. M. Collins, K. Ishimatsu, T. Y. C. Tsai, and S. G. Megason, *bioRxiv* , 469239 (2018).
- 938 [36] K. Ishihara and E. M. Tanaka, *Curr. Opin. Syst. Biol.* **11**, 123 (2018).
- 939 [37] M. L. Littman, in *Mach. Learn. Proc. 1994* (Elsevier, 1994) pp. 157–163.
- 940 [38] L. Canese, G. C. Cardarilli, L. Di Nunzio, R. Fazzolari, D. Giardino, M. Re, and S. Spanò, *Multi-Agent Reinforcement*  
941 *Learning: A Review of Challenges and Applications* (2021).
- 942 [39] J.-M. Lasry and P.-L. Lions, *Jap. J. Math.* **2**, 229 (2007).
- 943 [40] A. Pezzotta, M. Adorisio, and A. Celani, *Phys. Rev. E* **98**, 42401 (2018).
- 944 [41] R. Bellman, *Proc. Natl. Acad. Sci.* **38**, 716 (1952).
- 945 [42] D. P. Bertsekas, *Dynamic programming and optimal control*, Vol. 1 (Athena scientific Belmont, MA, 2005).
- 946 [43] V. Mnih, K. Kavukcuoglu, D. Silver, A. A. Rusu, J. Veness, M. G. Bellemare, A. Graves, M. Riedmiller, A. K. Fidjeland,  
947 G. Ostrovski, and Others, *Nature* **518**, 529 (2015).
- 948 [44] E. Todorov, *Proc. Natl. Acad. Sci.* **106**, 11478 (2009).
- 949 [45] K. Dvijotham and E. Todorov, *Artif. Intell.* , 1 (2011).
- 950 [46] C. Gardiner, *Springer Ser. Synerg.* (2009) [arXiv:arXiv:1011.1669v3](#).
- 951 [47] A. D. Ventsel' and M. I. Freidlin, *Russ. Math. Surv.* **25**, 1 (1970).
- 952 [48] R. Bellman, *Dynamic programming* (Courier Corporation, 2013).
- 953 [49] T. P. Lillicrap, J. J. Hunt, A. Pritzel, N. Heess, T. Erez, Y. Tassa, D. Silver, and D. Wierstra, *Continuous control with*  
954 *deep reinforcement learning* (2019), [arXiv:1509.02971 \[cs.LG\]](#).

- <sup>955</sup> [50] T. Haarnoja, A. Zhou, P. Abbeel, and S. Levine, Soft Actor-Critic: Off-Policy Maximum Entropy Deep Reinforcement  
<sup>956</sup> Learning with a Stochastic Actor (2018), [arXiv:1801.01290 \[cs.LG\]](#).

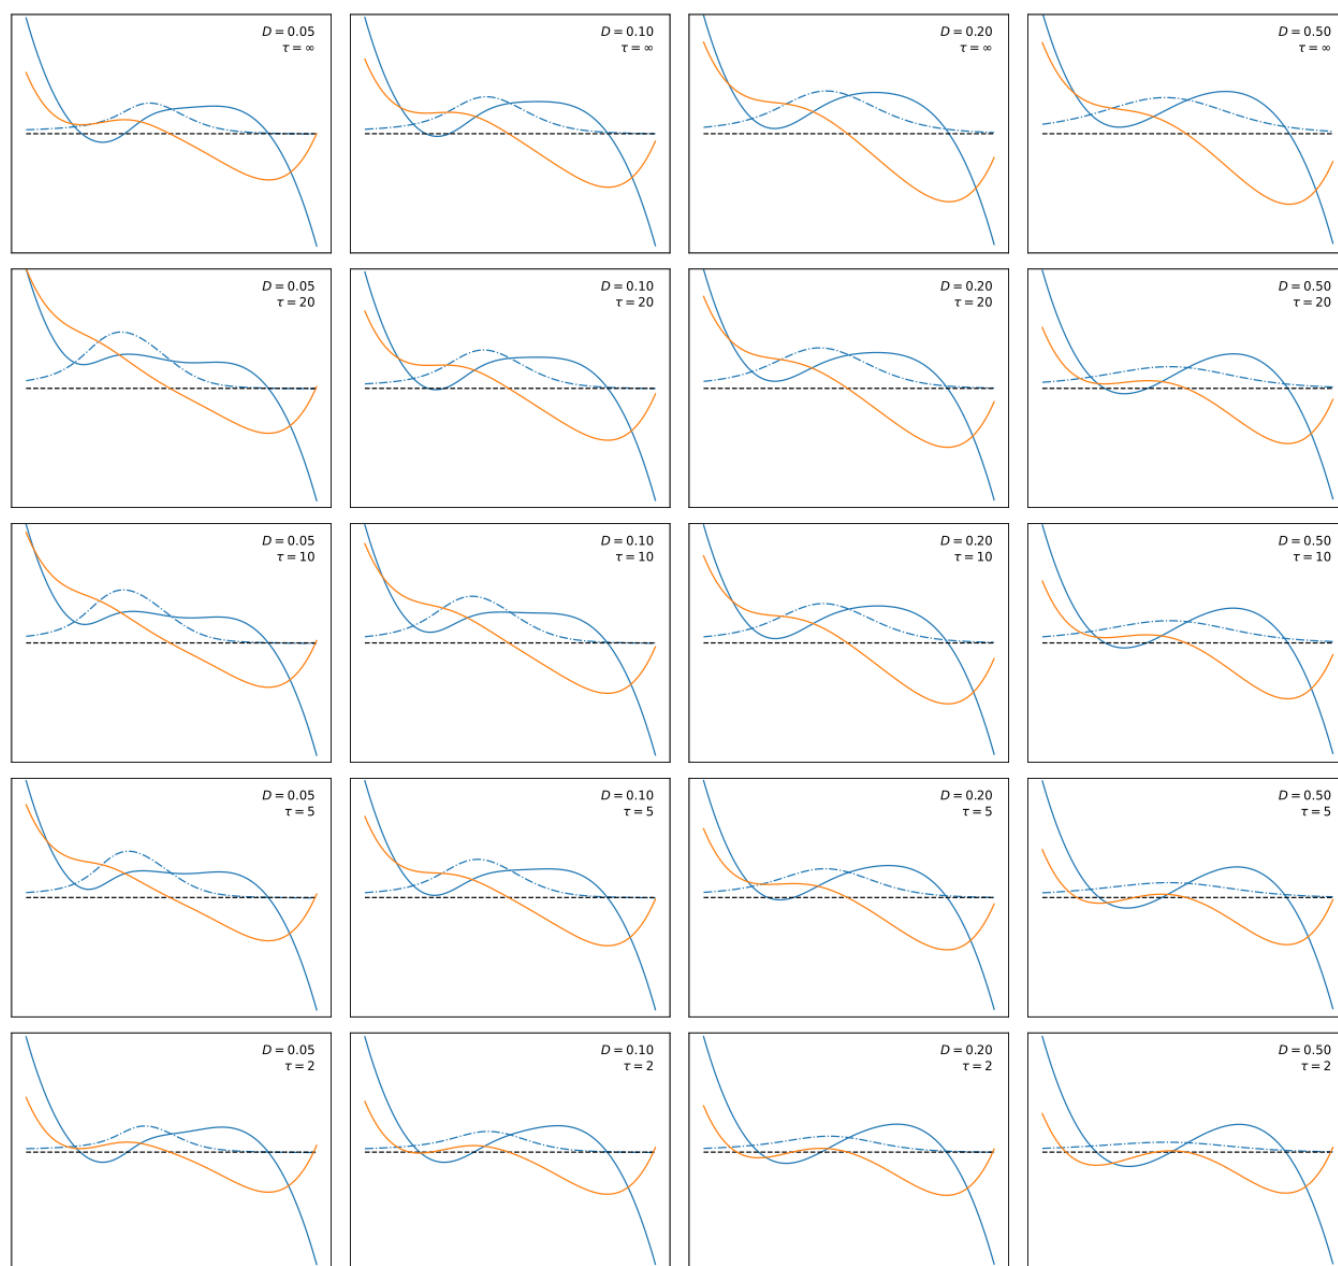

FIG. S1. Optimally controlled flow (solid blue), optimal control (dashed-dotted blue) and landscape (solid orange), for an array of values of  $D$  and  $\tau$ . The cost for control is set to  $\epsilon = 10$  in all panels.

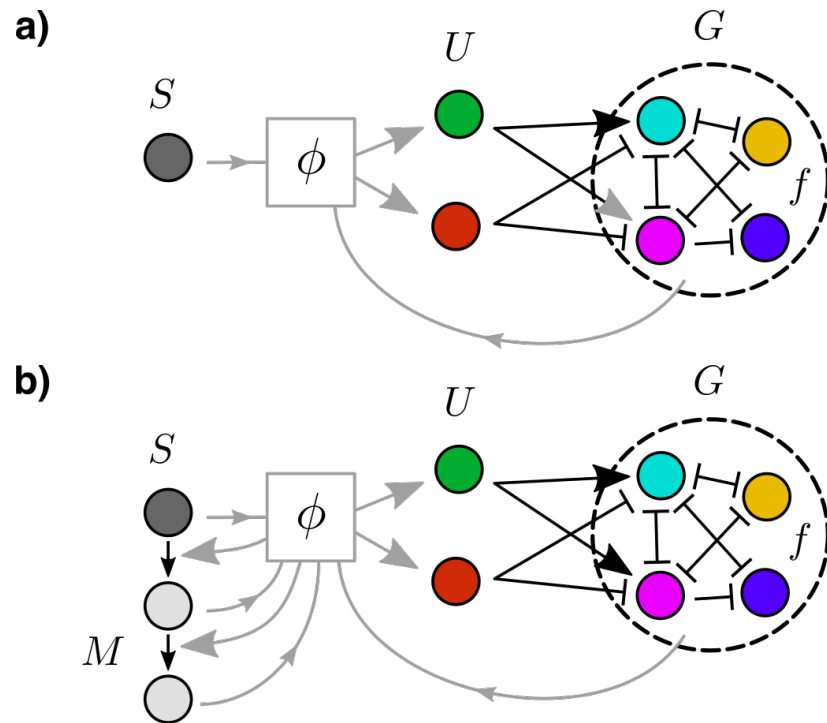

FIG. S2. Scheme of the model of the environment. The model where the local morphogen signal is added to the GRN concentration to give the full state of the environment (a) is augmented by adding variables –in this case 2– that integrate the signal and contain memory information (b).

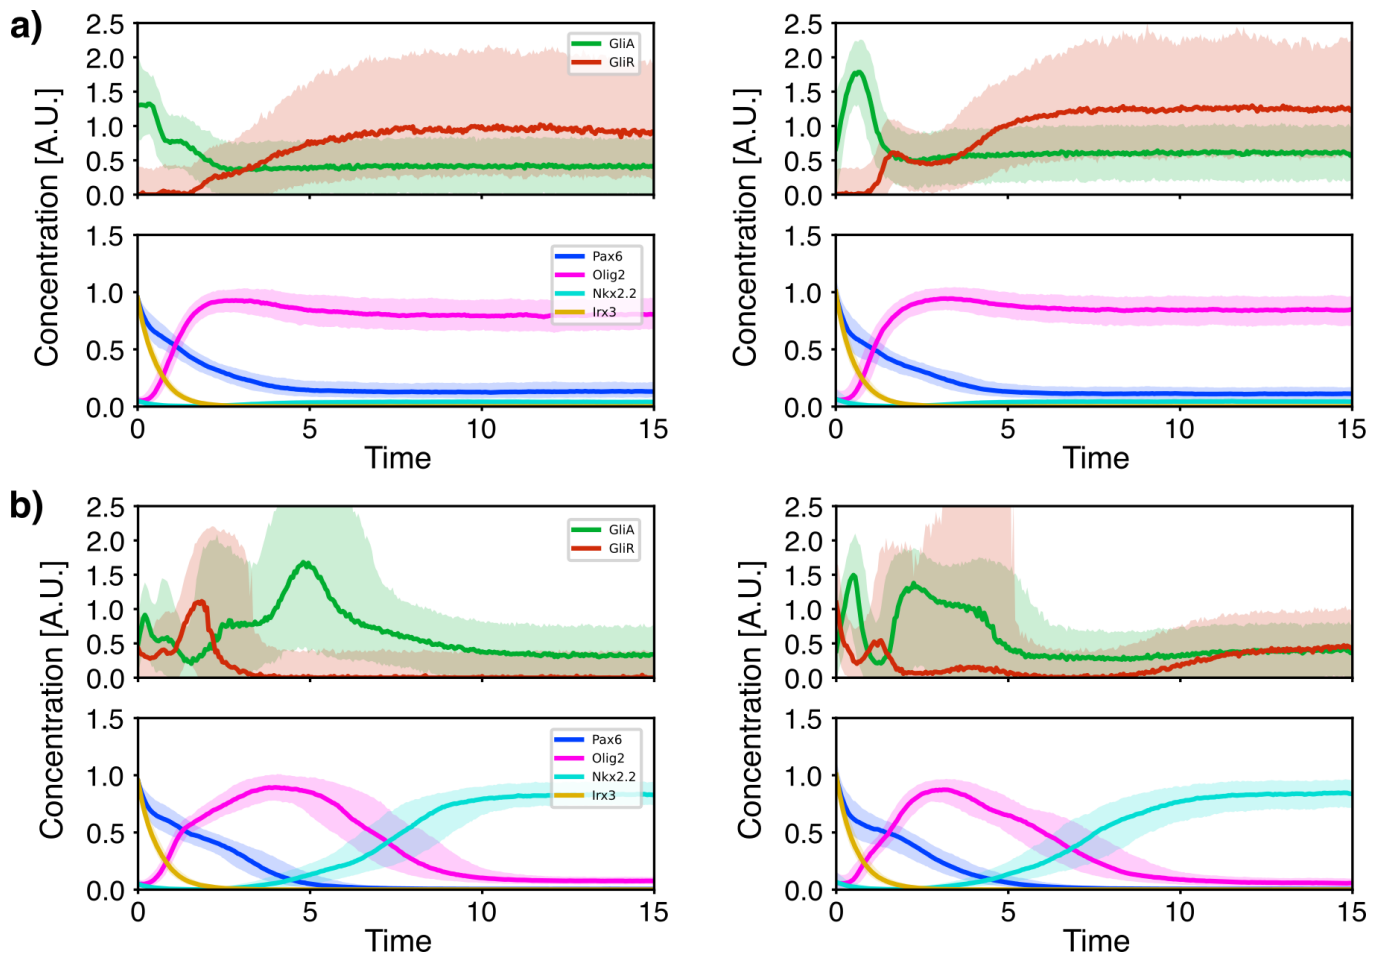

FIG. S3. Comparison between different reinforcement learning solutions for the optimal control of the ventral neural tube GRN [13]. The solution presented in the main text (left) compared with the best solution of a different experiment with the same algorithm (right), for (a) the Olig2+ target and (b) the Nkx2.2+ target.



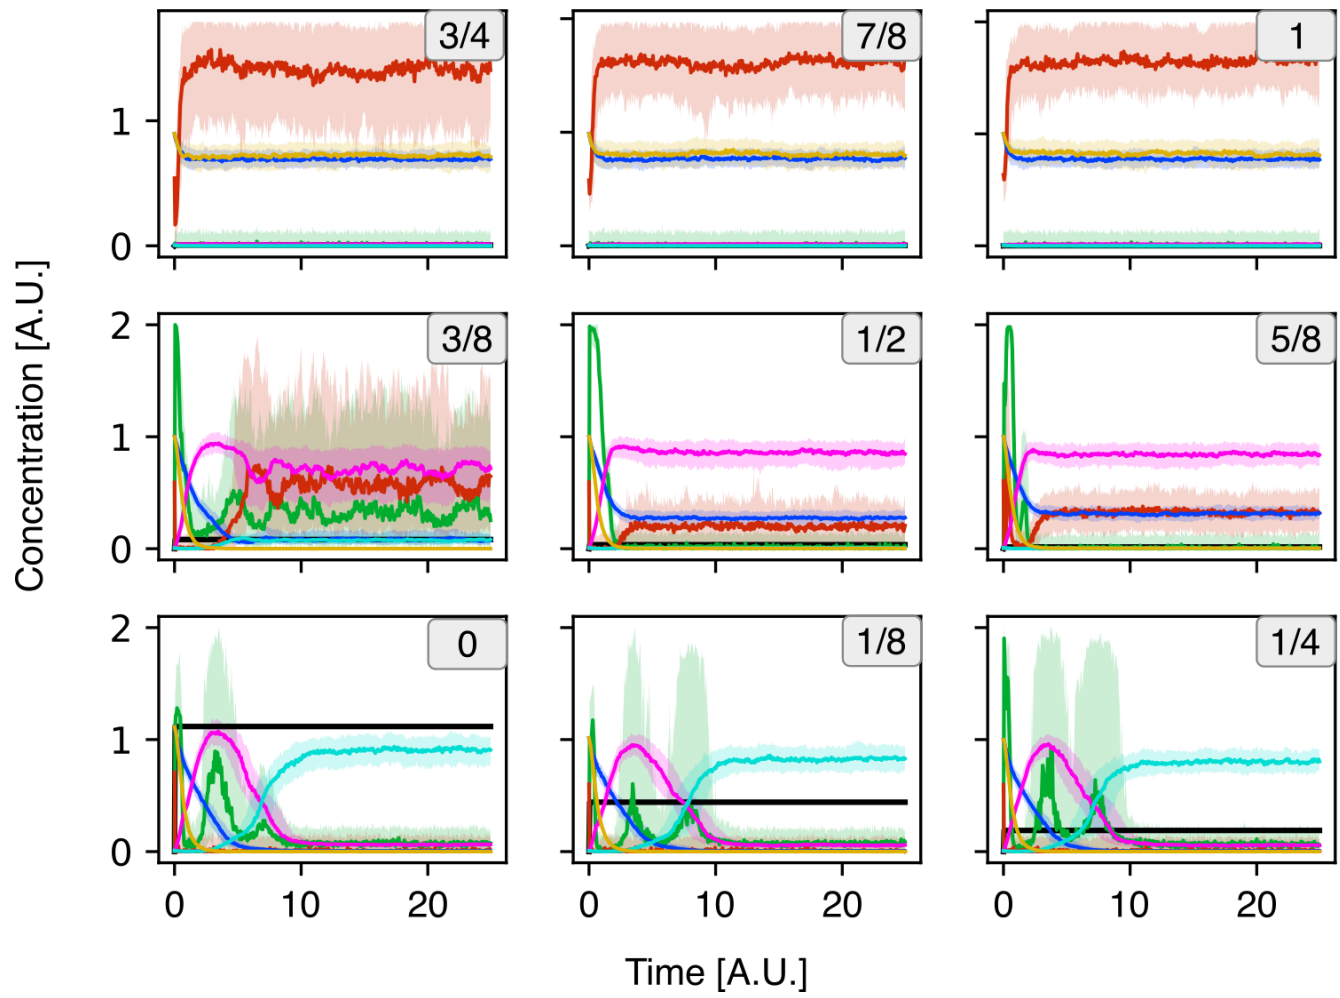

FIG. S4. Patterning dynamics for static gradient, when the independent agent ansatz is exact
